# Supplementary material for: Low-generation fluorescent polyurethane dendrimers via late-stage modification using azide–alkyne click chemistry
Source: Royal Society of Chemistry journal article supplement (doi:10.1039/d2ra04937f), 2022-01-01
Supplement: d2ra04937f1.pdf [file d2ra04937f1.pdf]

## SUPPORTING INFORMATION

### **Low-generation fluorescent polyurethane dendrimers *via* late-stage modification using azide-alkyne click chemistry**

Dhruba P. Poudel and Richard T. Taylor\*

Department of Chemistry and Biochemistry, Miami University, 501 E High Street,  
Oxford, Ohio 45056, USA  
E-mail: [taylorrt@miamioh.edu](mailto:taylorrt@miamioh.edu)

## Table of Contents

|                                                                                                 |           |
|-------------------------------------------------------------------------------------------------|-----------|
| <b>1. Notes on equations for the experimental section.....</b>                                  | <b>3</b>  |
| a. <i>Synthesis of dendron 3 using one-pot multicomponent Curtius reaction .....</i>            | <i>3</i>  |
| b. <i>Synthesis of azidocoumarins .....</i>                                                     | <i>4</i>  |
| c. <i>Copper catalyzed azide-alkyne click reaction to synthesize fluorescent dendrons .....</i> | <i>5</i>  |
| d. <i>Attachment of dendrons to the core.....</i>                                               | <i>6</i>  |
| e. <i>Surface modification of dendrimer 10 via CuAAC using two different coumarins.....</i>     | <i>7</i>  |
| f. <i>UV images of fluorescent compounds during isolation .....</i>                             | <i>9</i>  |
| <b>2. NMR spectra of synthesized compounds .....</b>                                            | <b>10</b> |
| <b>3. Mass spectra of synthesized compounds .....</b>                                           | <b>43</b> |
| <b>4. UV-Vis and fluorescence spectra of PUDs 11 – 15. ....</b>                                 | <b>51</b> |
| <b>5. References .....</b>                                                                      | <b>52</b> |

# 1. Notes on equations for the experimental section

## a. Synthesis of dendron **3** using one-pot multicomponent Curtius reaction

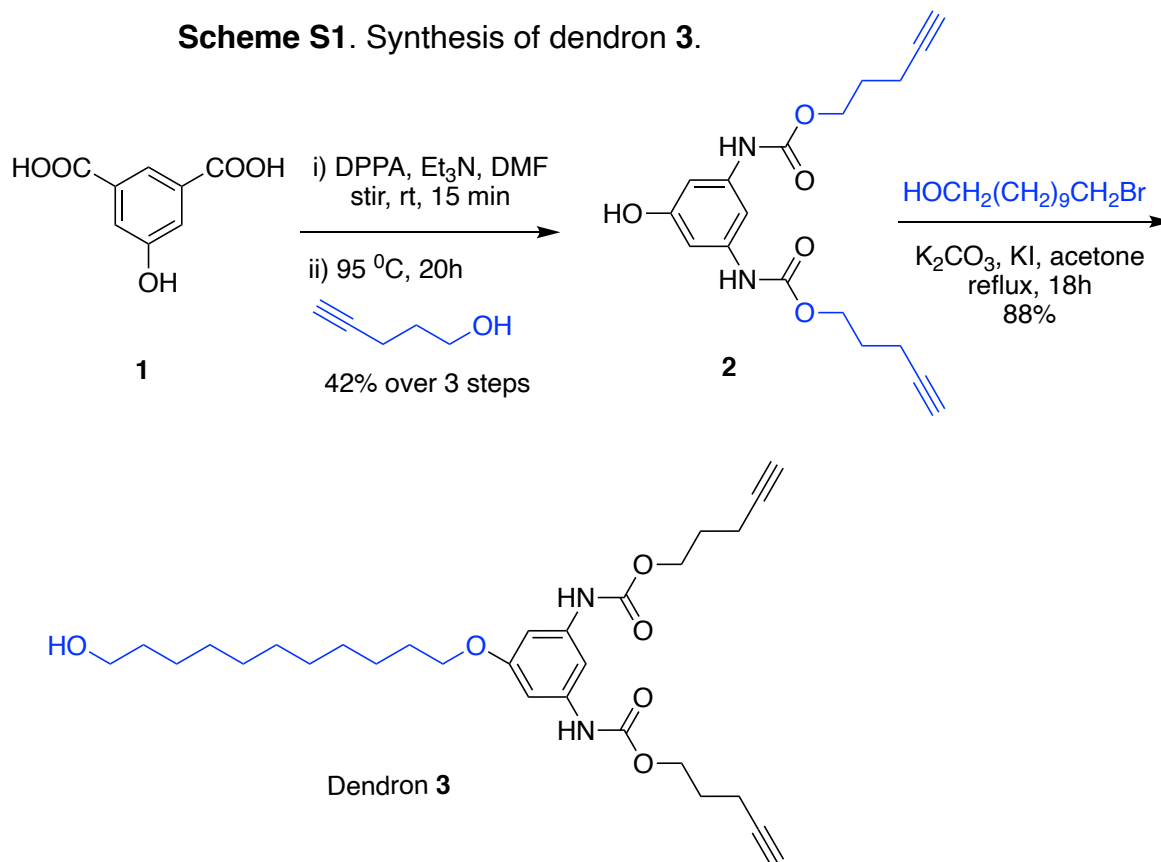

### Notes:

- For a large-scale reaction, it is advised to carry out the addition of DPPA under ice bath because of exothermic nature of the reaction.
- On heating, Curtius rearrangement ( $\text{CON}_3$  to  $\text{NCO}$ ) proceeds *violently* releasing  $\text{N}_2$  gas *rapidly*. At this point, the reaction vessel should not be sealed completely to prevent possible *explosion*.
- This reaction can be monitored using IR tracking the azide peak at  $\sim 2100\text{ cm}^{-1}$ .
- Details of this particular reaction including the formation of side products has been discussed previously.<sup>a</sup>

b. Synthesis of azidocoumarins

**Scheme S2.** Synthesis of 3-Azido-7-diethylaminoazidocoumarin **4**.

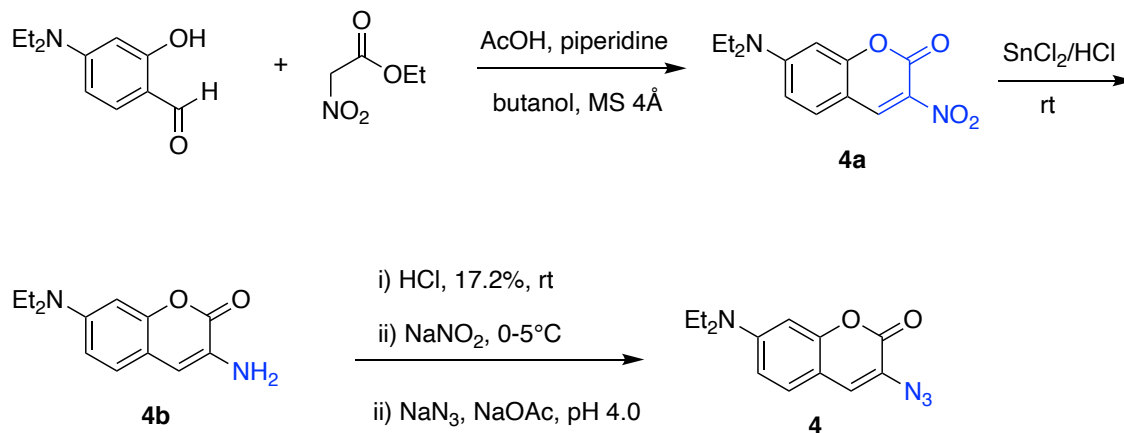

**Scheme S3.** Synthesis of 9-Azido-2,3,5,6-tetrahydro-1H, 4H-11-oxa-3a-aza-benzo[de]anthracene-10-one **5**

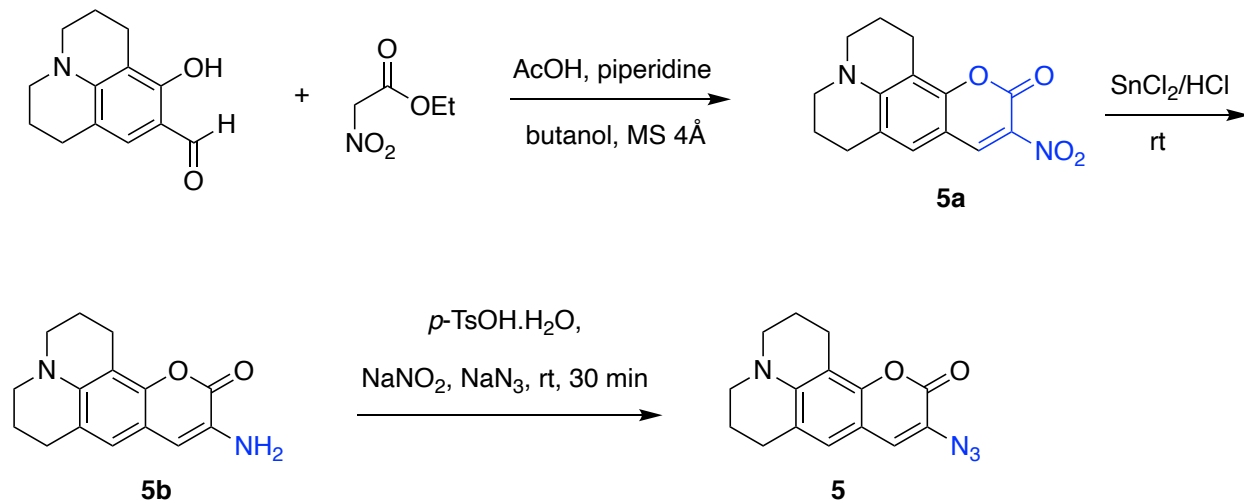

c. Copper catalyzed azide-alkyne click reaction to synthesize fluorescent dendrons

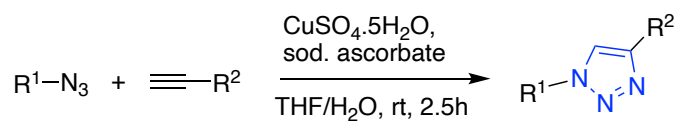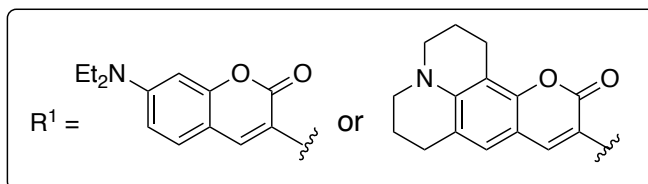

*Blue/mint-green fluorescing dendrons 7, 8, and 9*

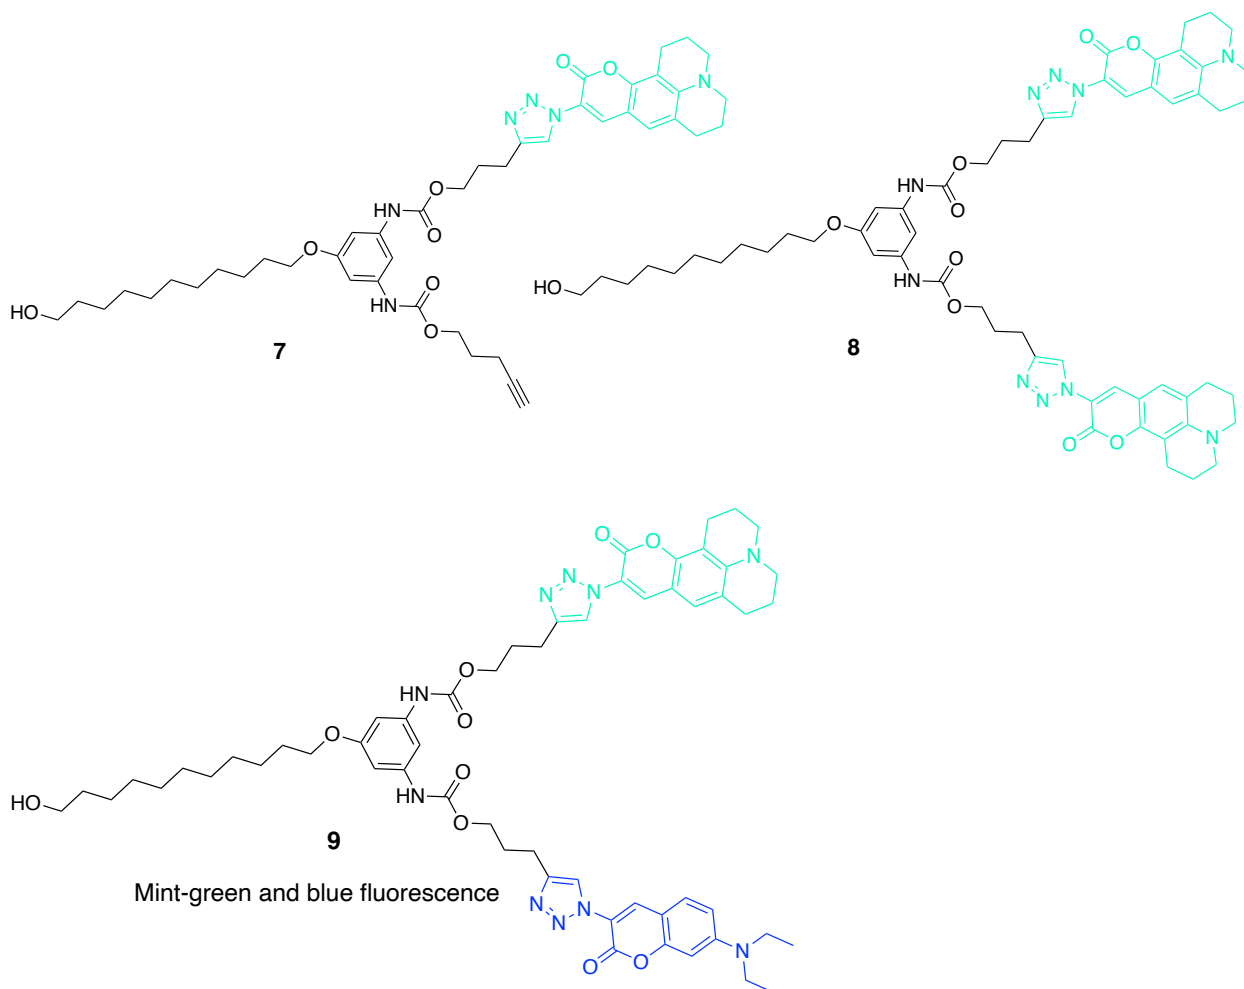

Notes:

- This particular copper catalyzed azide-alkyne cycloaddition (CuAAC) was found to be very slow under aforementioned conditions. With azidocoumarin **5**, a mixture of products containing one-clicked and two-clicked, were obtained even with longer reaction time (up to 7 days).
- Performing the reaction at 50 °C also yielded the mixture of products though it increased the yield of two-clicked product slightly.
- One-clicked product **7** was subjected to another CuAAC using a different coumarin to afford a dendron having both mint green and blue fluorescence.

d. Attachment of dendrons to the core

Scheme S4. Synthesis of non-fluorescent dendrimer **10**.

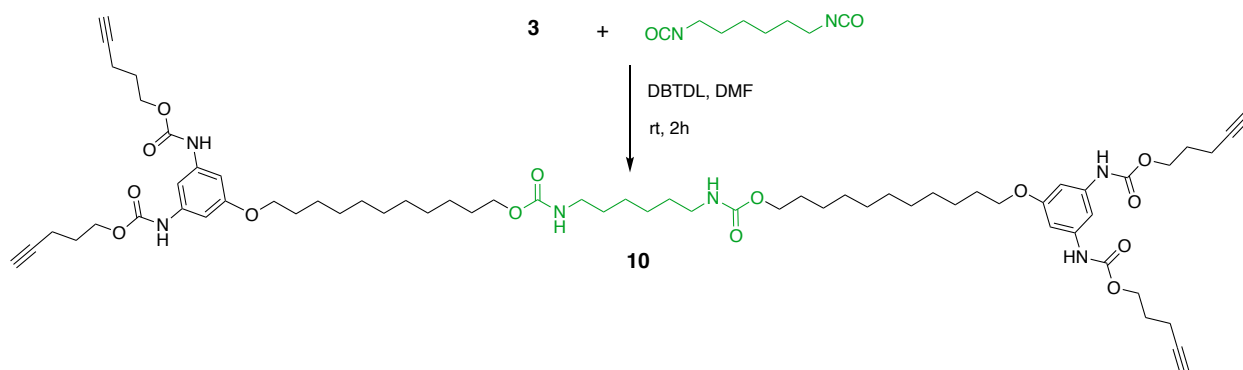

Scheme S5. Synthesis of fluorescent dendrimer **13**.

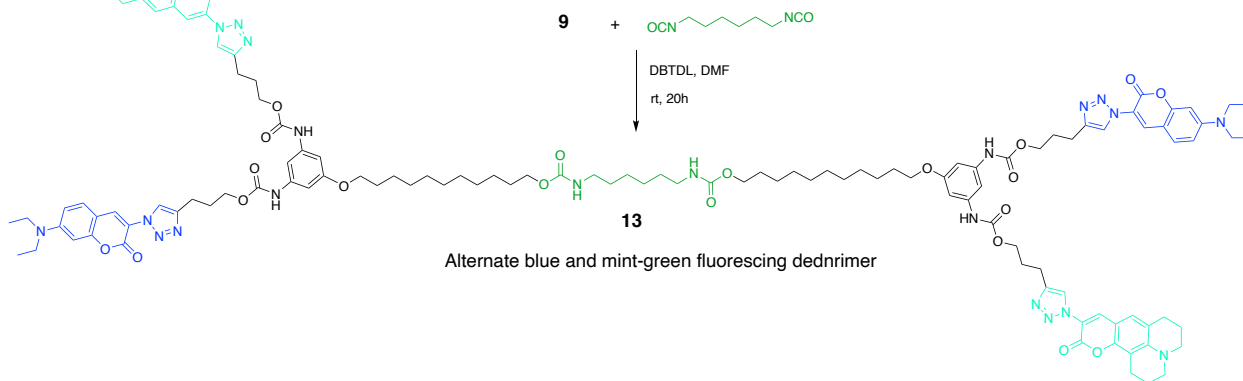

**Scheme S6.** Synthesis of fluorescent dendrimers **11**, **14**, and **15**.

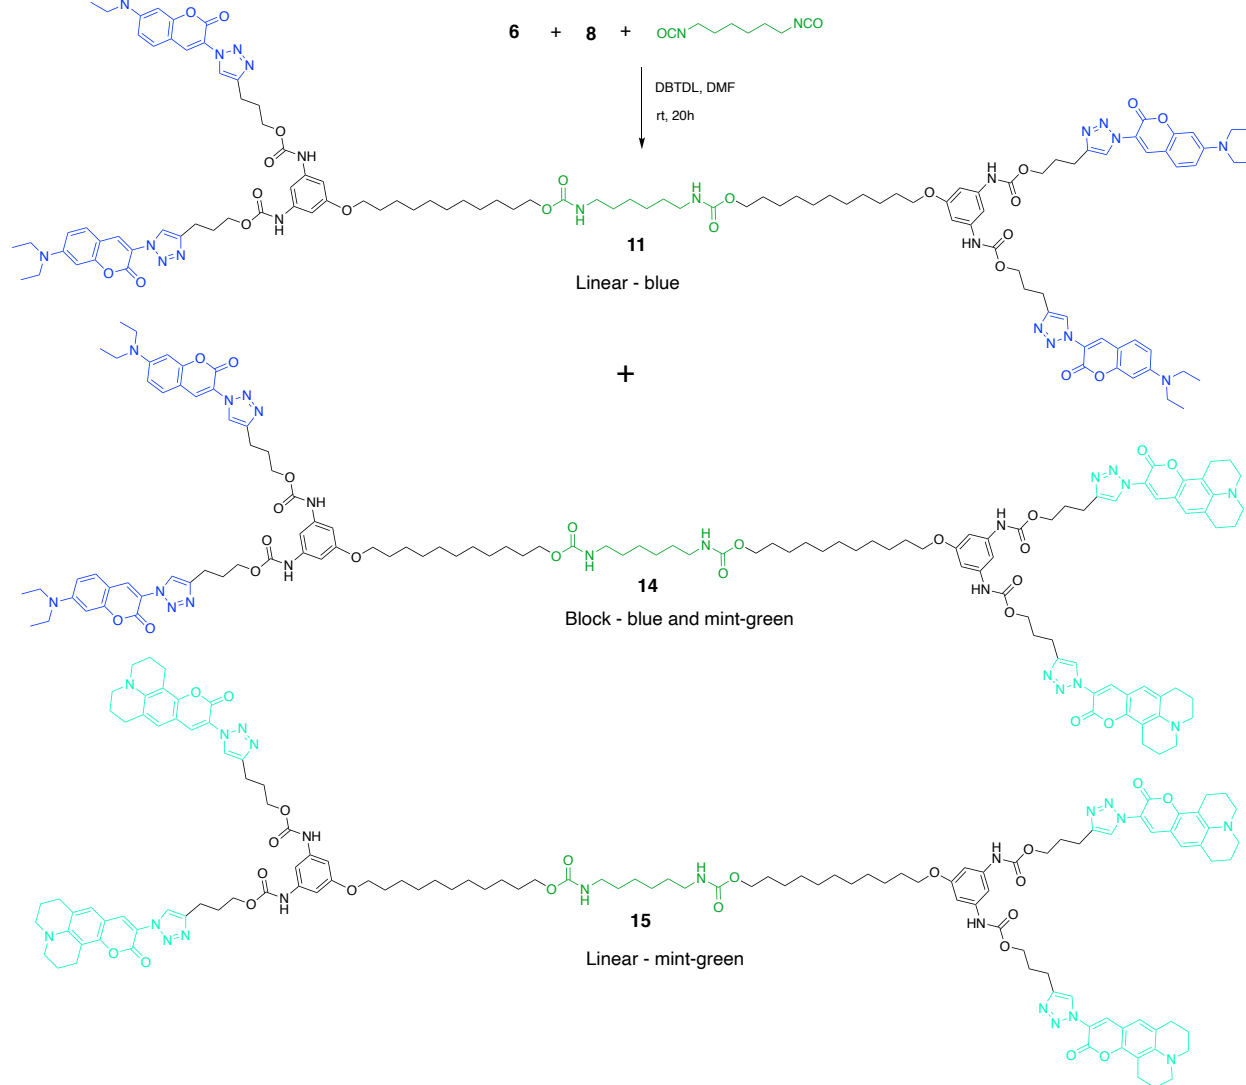

e. Surface modification of dendrimer **10** via CuAAC using two different coumarins

**Scheme S7.** Possible fluorescent polyurethane dendrimers *via* CuAAC.

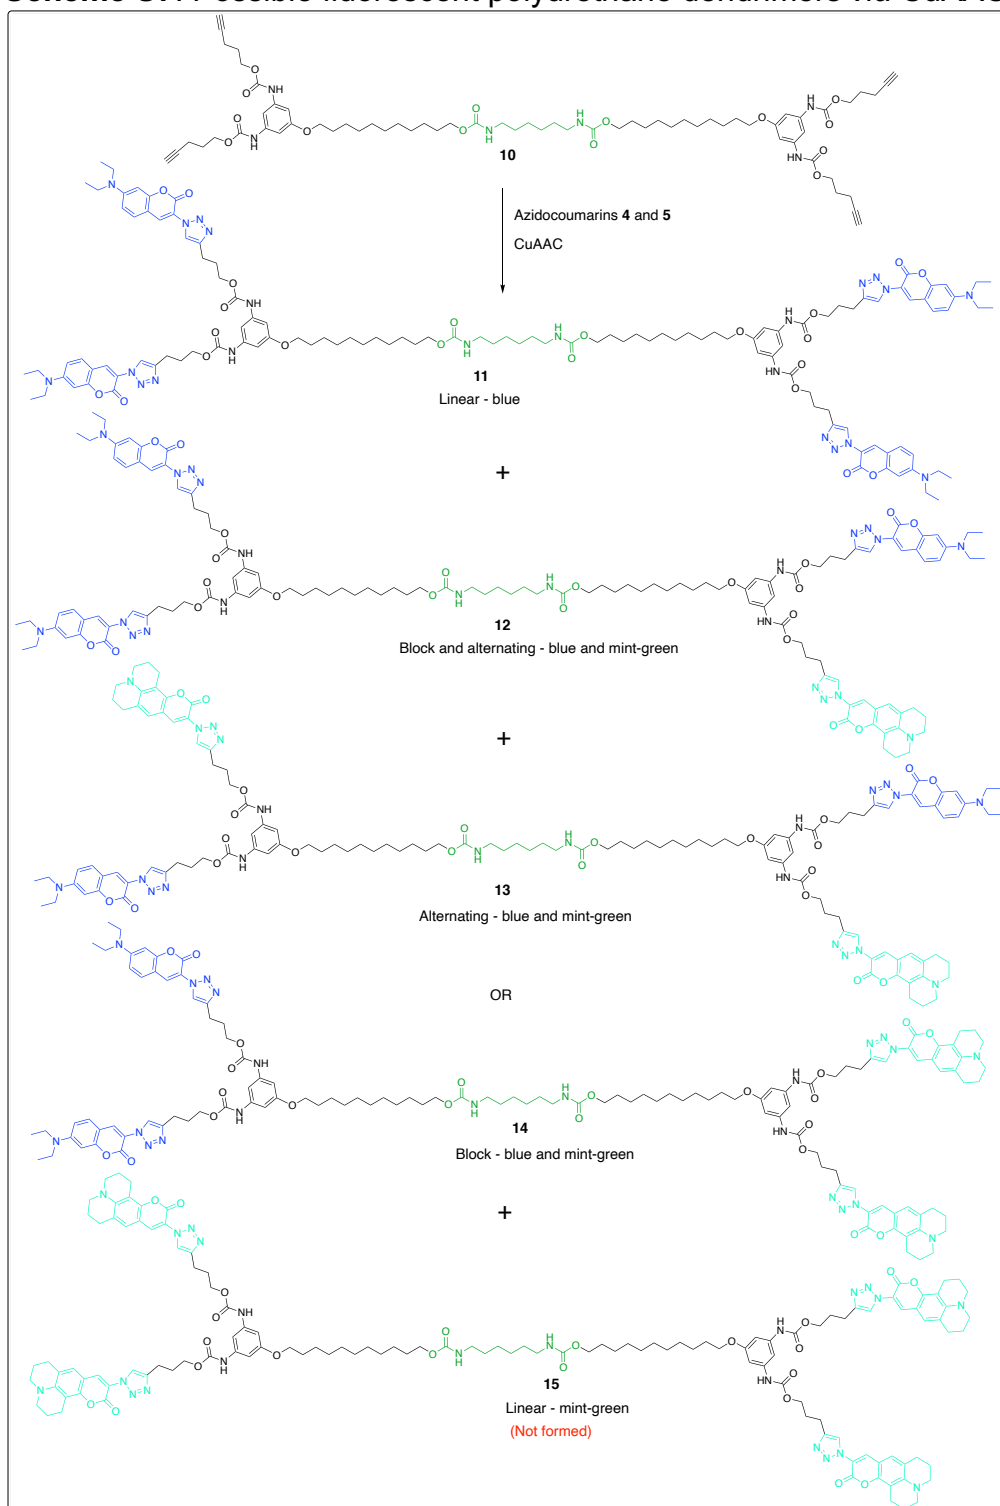



Notes:

- Surprisingly, this reaction exclusively formed dendrimer **12** (80% of the products) showing very slow clicking of azidocoumarin **5** with alkyne.
- Other products isolated involved dendrimer **11**, **13**, and **14**. However, **13** and **14** were not distinguished from each other.
- Dendrimer with mint green fluorescence only was not formed in the reaction, which again supports extremely slow reactivity of azidocoumarin **5**.

f. UV images of fluorescent compounds during isolation

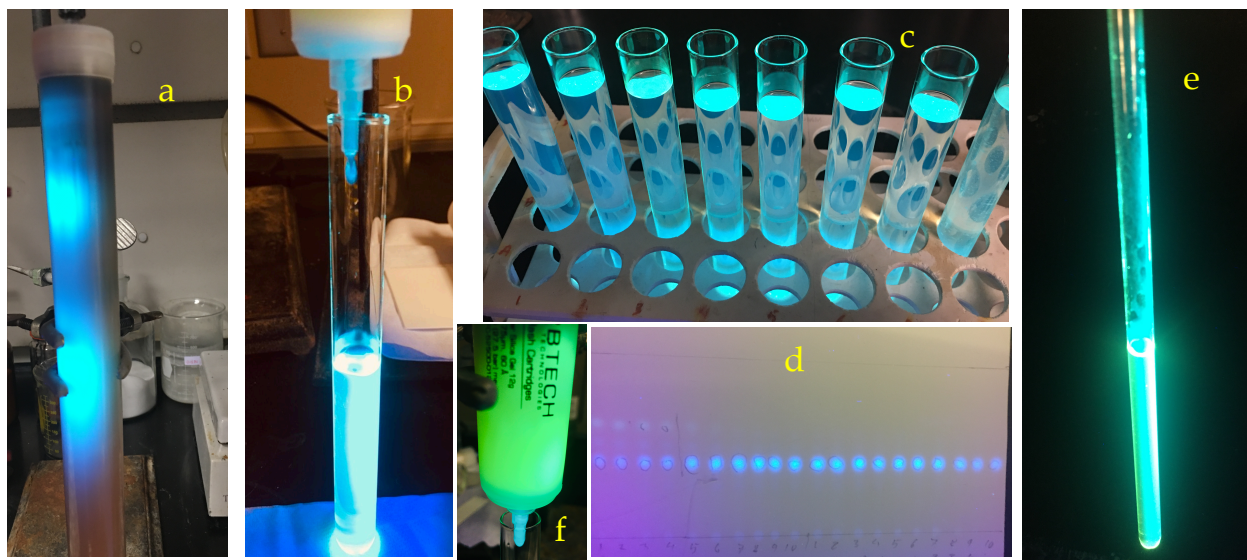

**Figure S1.** UV Images of fluorescent compounds at different of synthesis; a) blue fluorescing compound showing two distinct bands in column, b) flash chromatography of blue fluorescing compound, c) collected fractions, d) TLC spots showing the separation, e) blue fluorescing compound dissolved in  $\text{CDCl}_3$  in an NMR tube, and f) flash chromatographic column showing mint green fluorescing compound.

## 2. NMR spectra of synthesized compounds

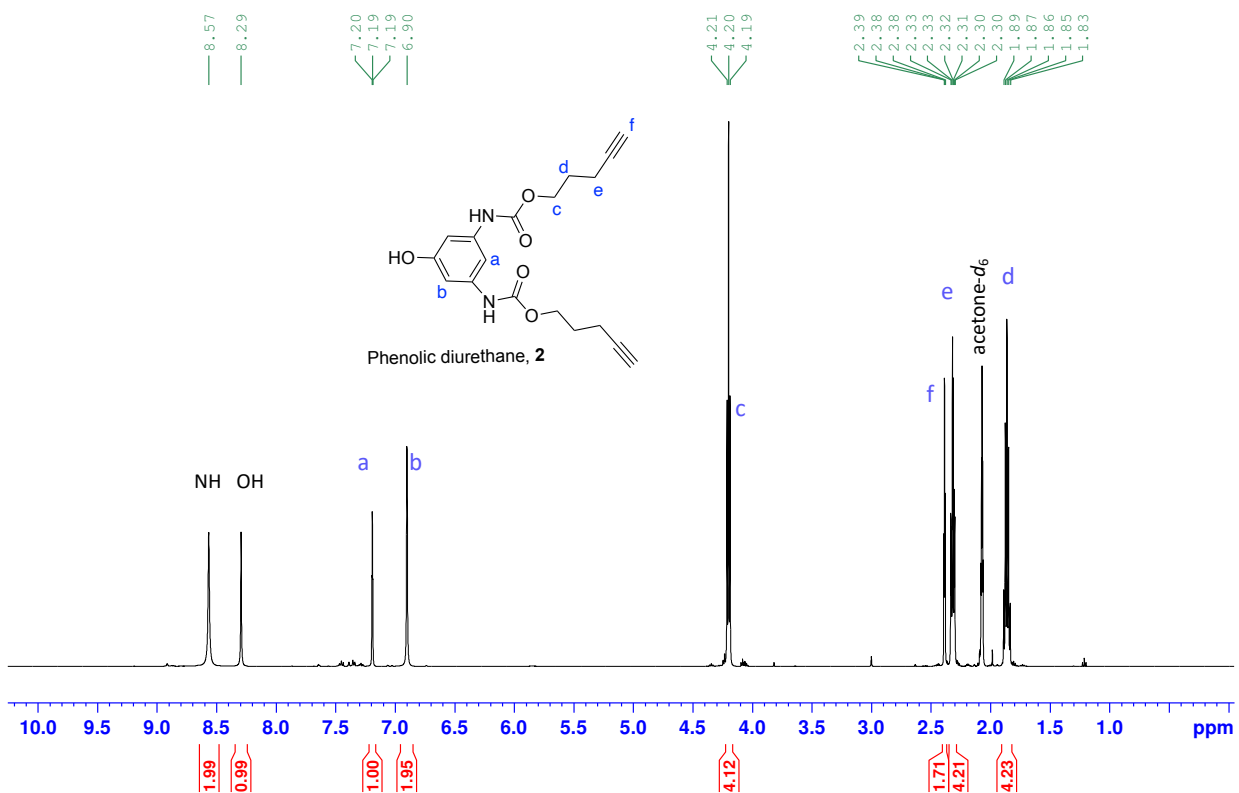

**Figure S2.** <sup>1</sup>H NMR spectrum (500 MHz, CD<sub>3</sub>COCD<sub>3</sub>, 298 K) of phenolic diurethane **2**.

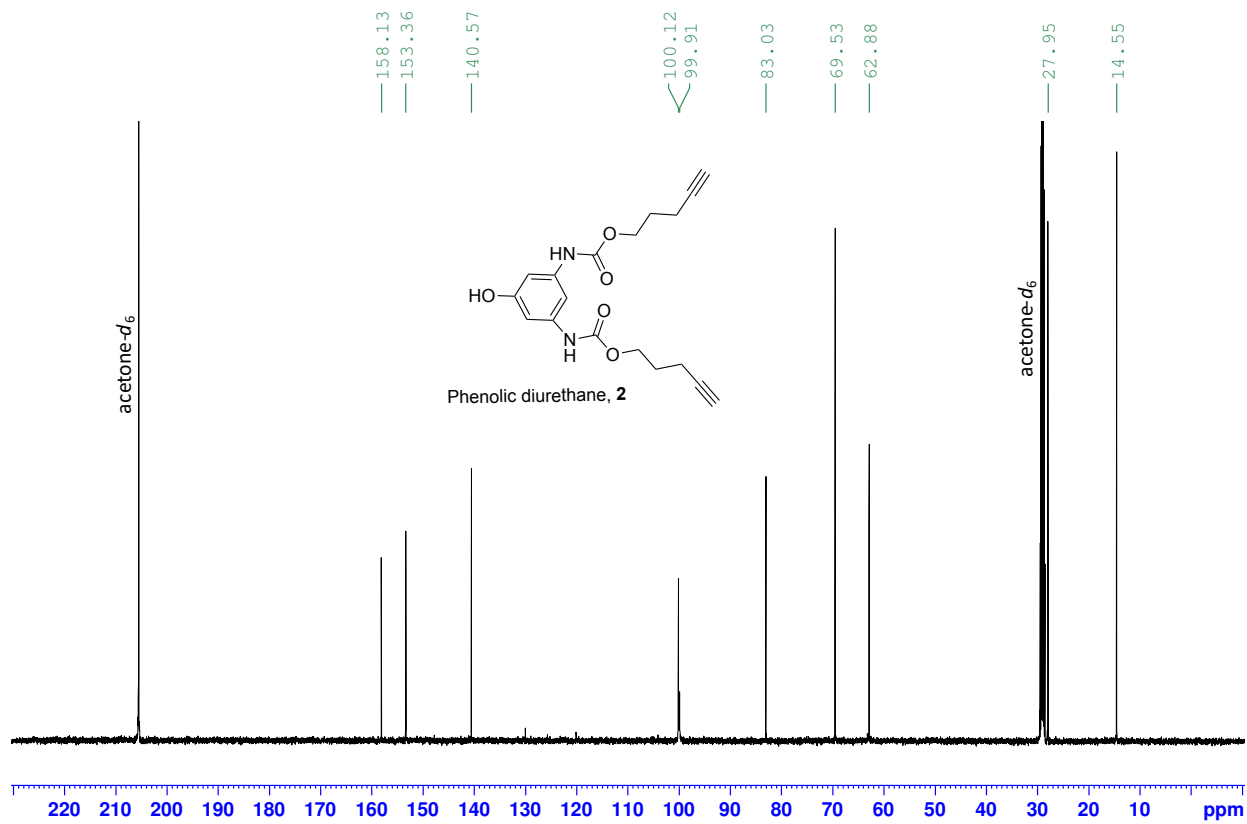

**Figure S3.**  $^{13}\text{C}$  NMR spectrum (500 MHz,  $\text{CD}_3\text{COCD}_3$ , 298 K) of phenolic diurethane **2**.

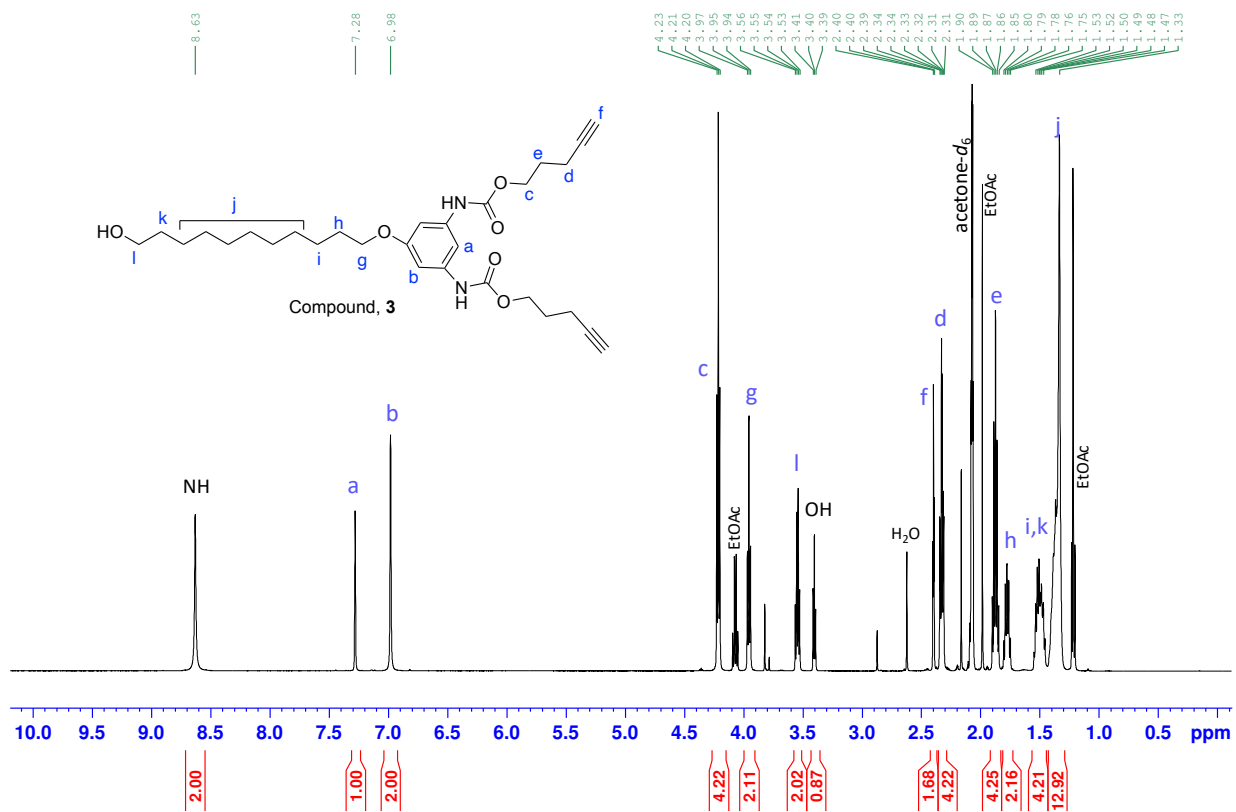

Figure S4. <sup>1</sup>H NMR spectrum (500 MHz, CD<sub>3</sub>COCD<sub>3</sub>, 298 K) of compound 3.

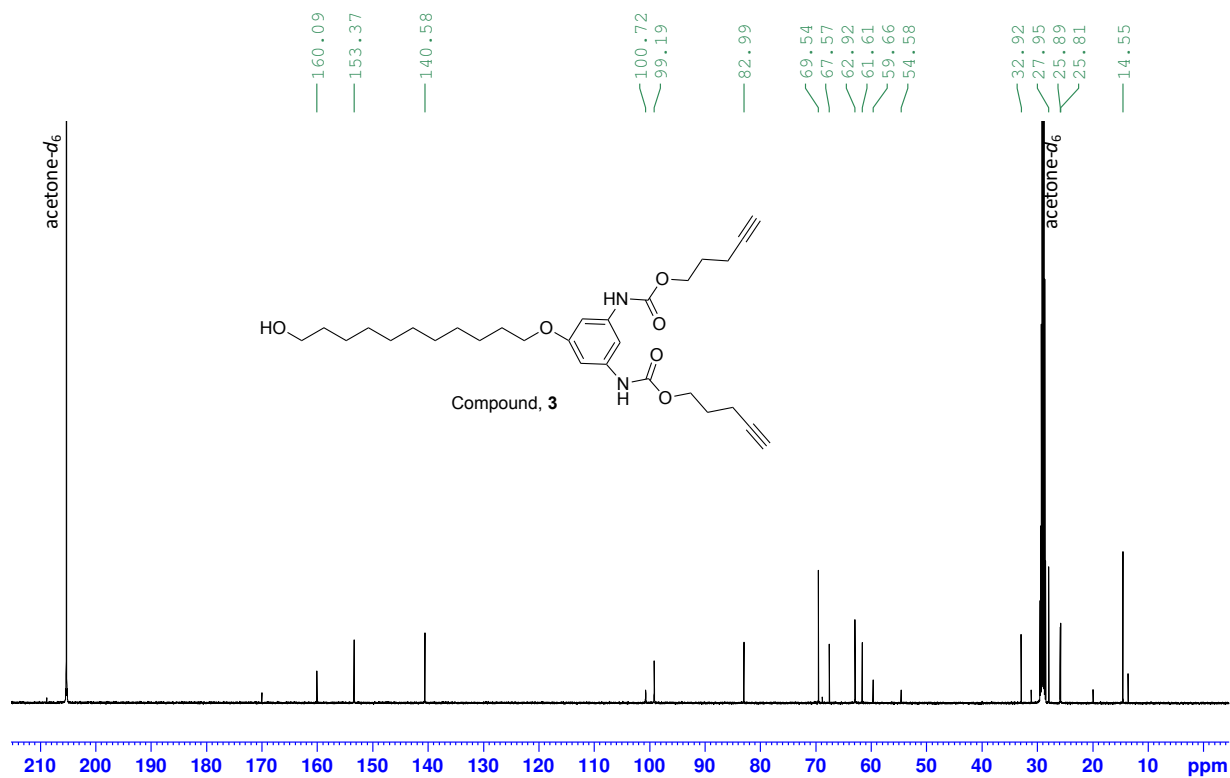

**Figure S5.** <sup>13</sup>C NMR spectrum (126 MHz, CD<sub>3</sub>COCD<sub>3</sub>, 298 K) of compound **3**.

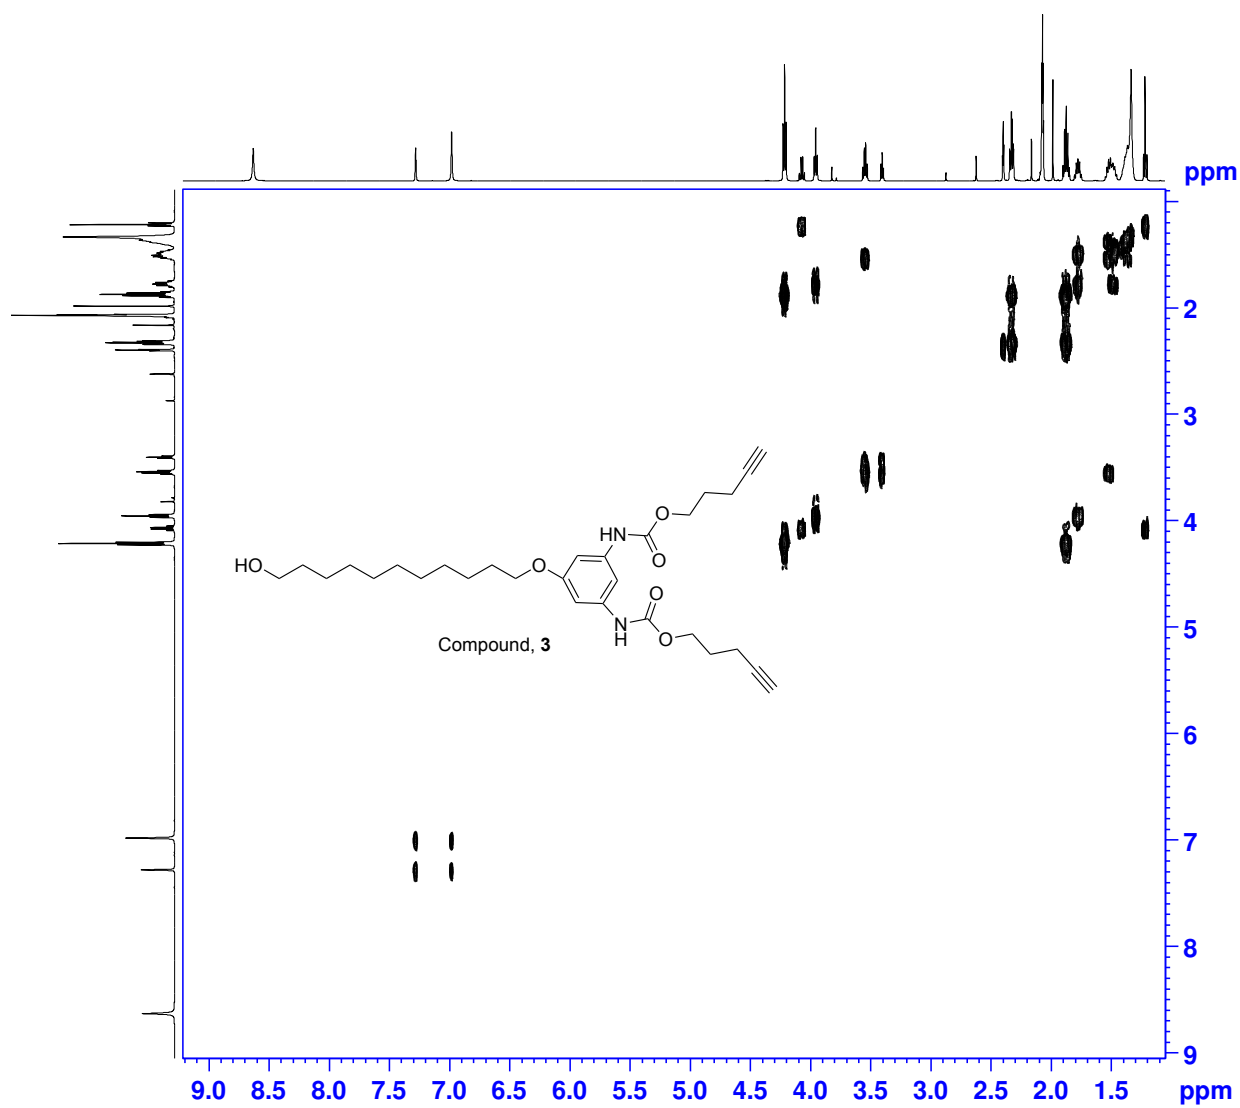

**Figure S6.** COSY (<sup>1</sup>H-<sup>1</sup>H) spectrum (500 MHz, CD<sub>3</sub>COCD<sub>3</sub>, 298 K) of compound 3.

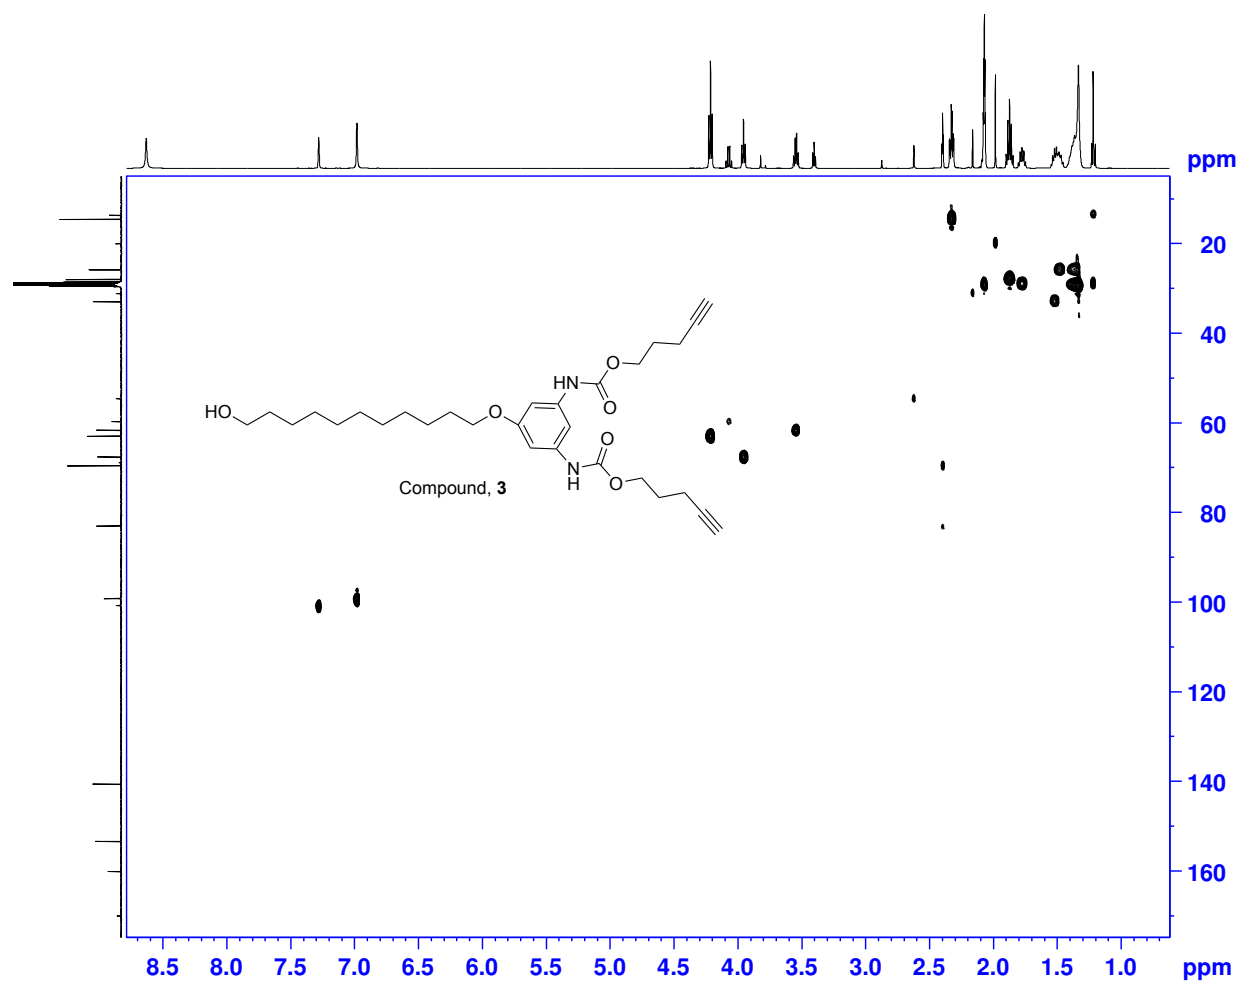

**Figure S7.** HSQC ( $^1\text{H}$ - $^{13}\text{C}$ ) spectrum (500 MHz,  $\text{CD}_3\text{COCD}_3$ , 298 K) of compound 3.

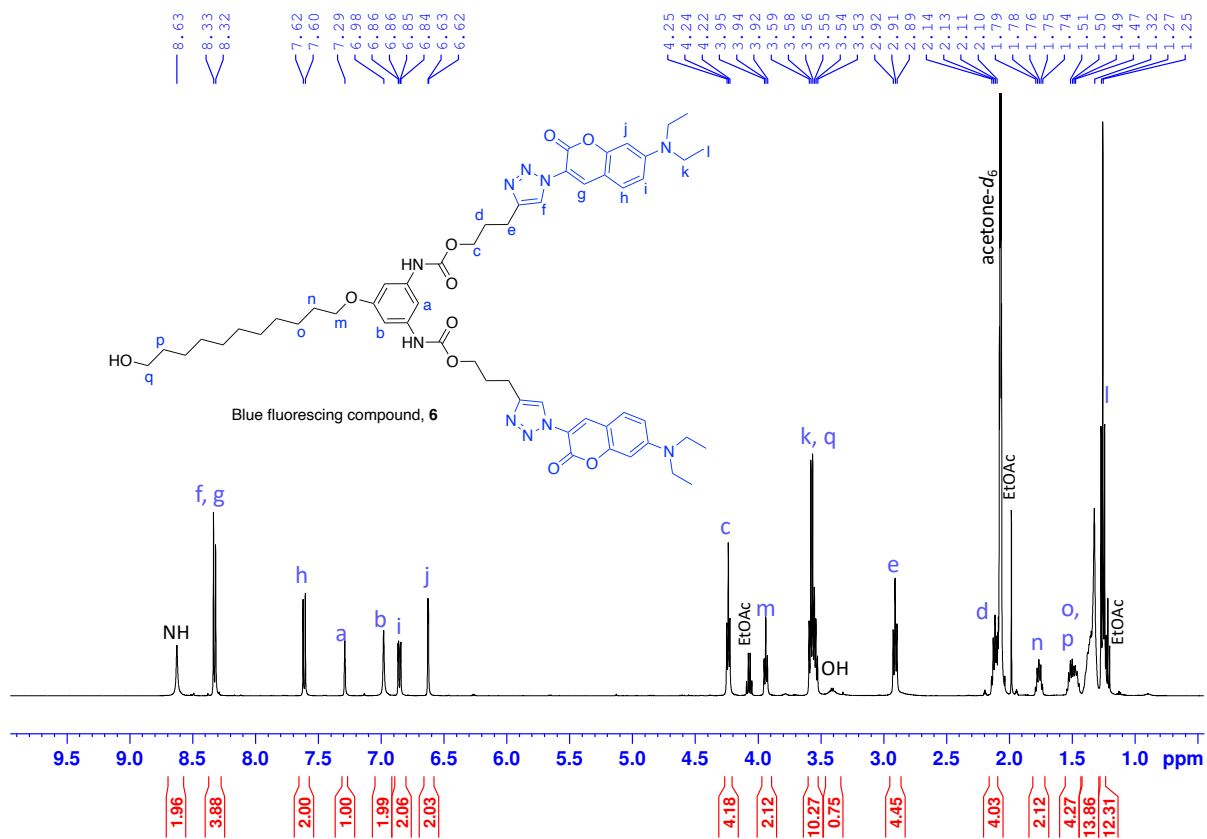

**Figure S8.** <sup>1</sup>H NMR spectrum (500 MHz, CD<sub>3</sub>COCD<sub>3</sub>, 298 K) of blue fluorescent compound **6**.



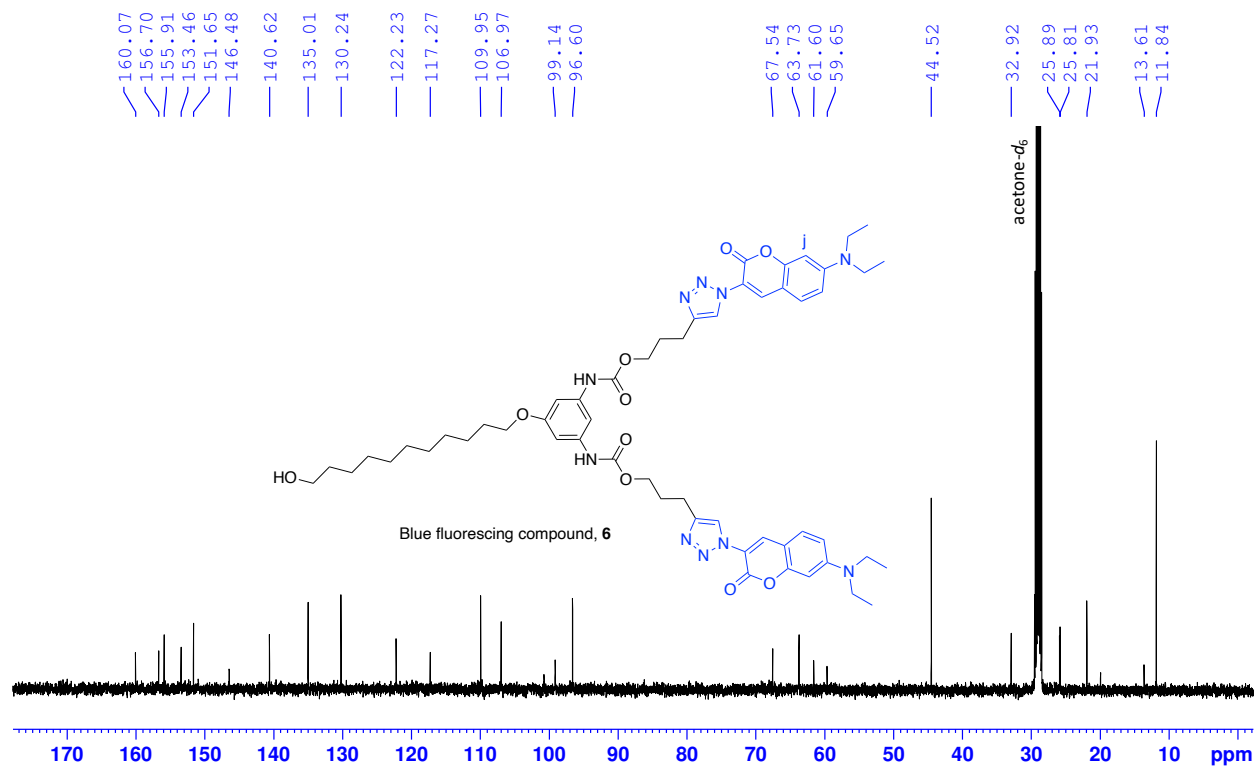

**Figure S9.** <sup>13</sup>C NMR spectrum (126 MHz, CD<sub>3</sub>COCD<sub>3</sub>, 298 K) of blue fluorescent compound 6.

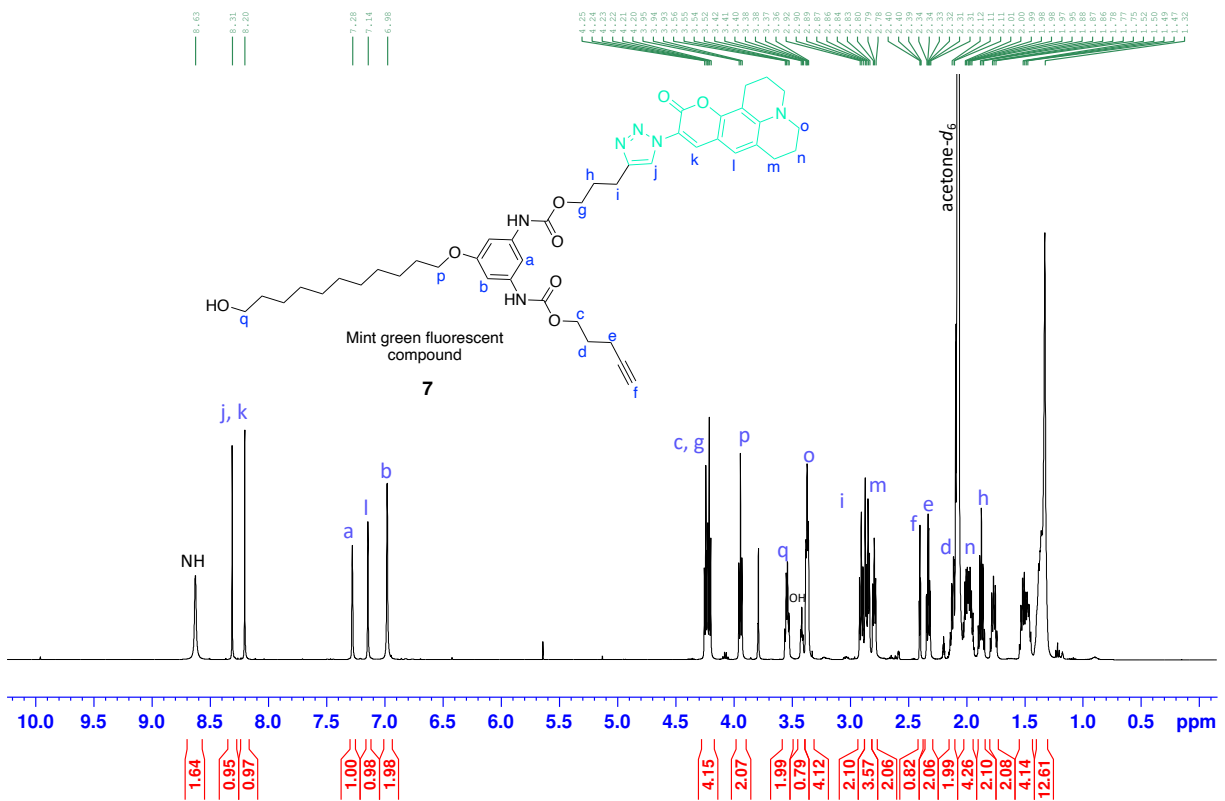

**Figure S10.**  $^1\text{H}$  spectrum (500 MHz,  $\text{CD}_3\text{COCD}_3$ , 298 K) of one-clicked mint green fluorescent compound **7**.

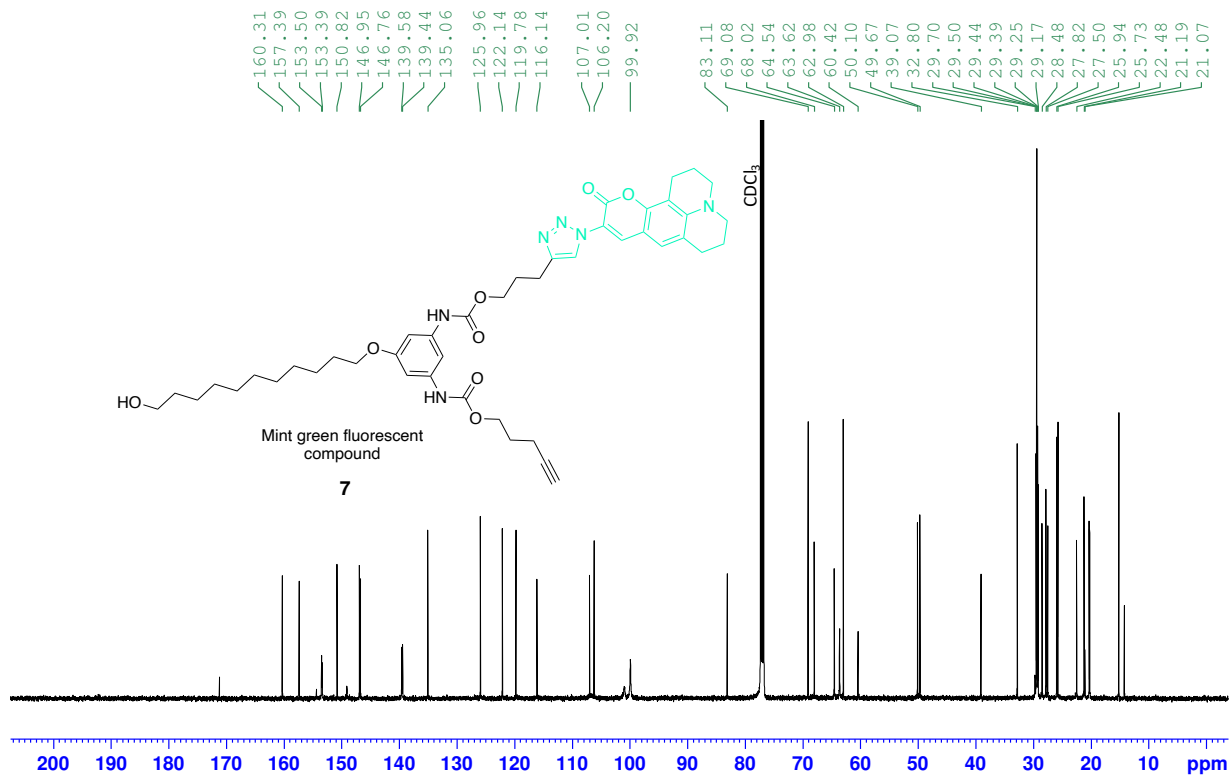

**Figure S11.**  $^{13}\text{C}$  spectrum (500 MHz,  $\text{CD}_3\text{COCD}_3$ , 298 K) of one-clicked mint green fluorescing compound **7**.

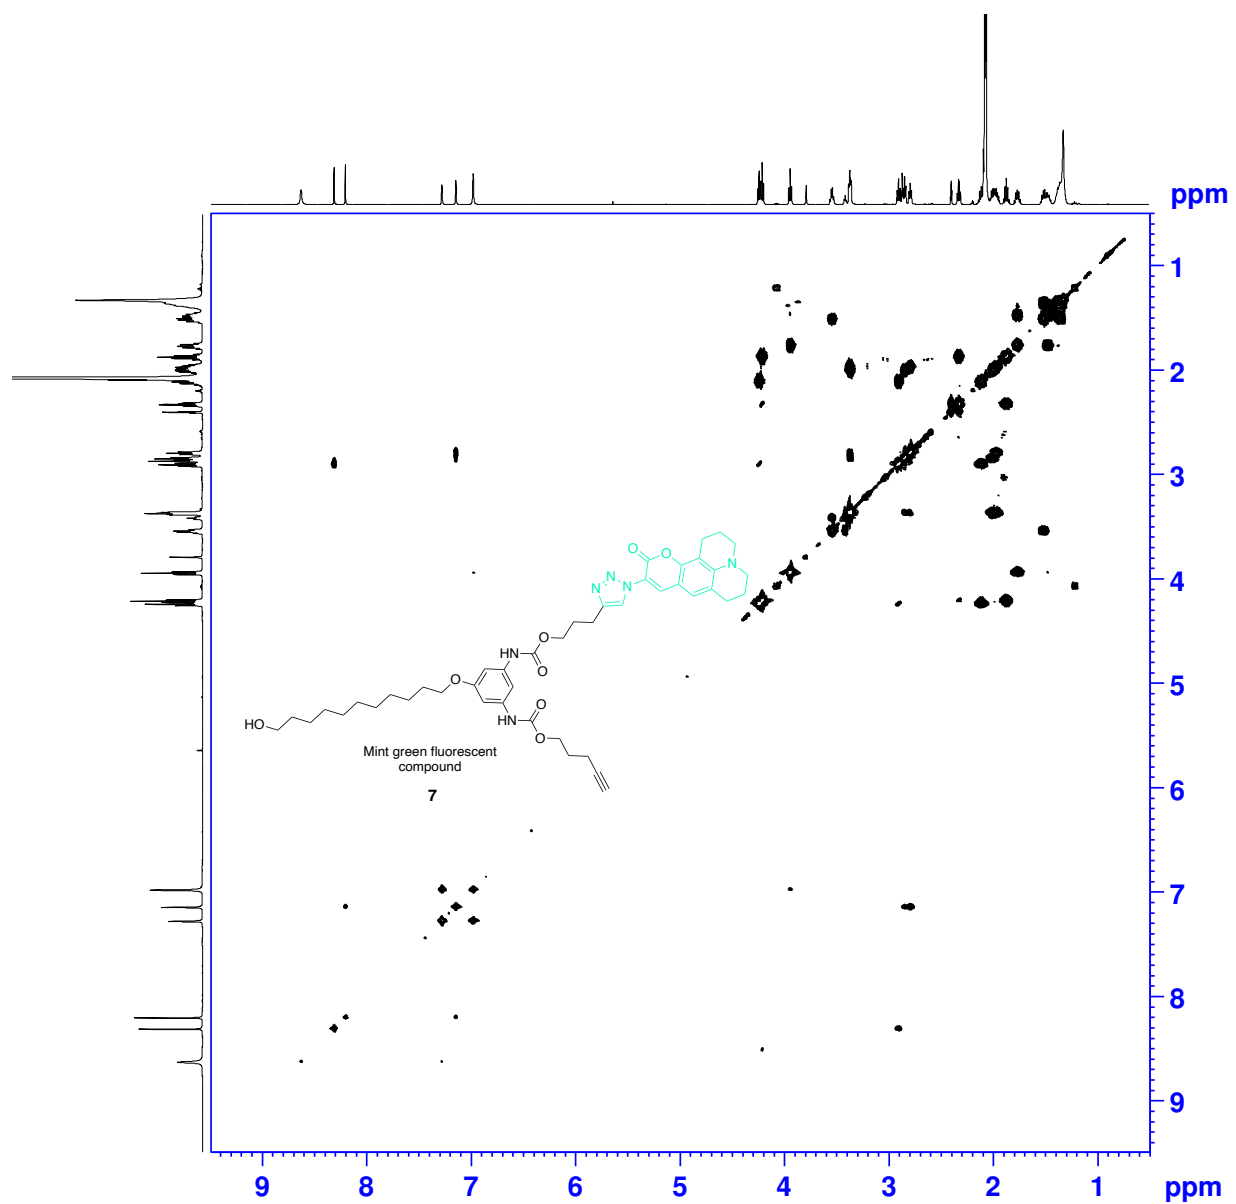

**Figure S12.** COSY ( $^1\text{H}$ - $^1\text{H}$ ) spectrum (500 MHz,  $\text{CD}_3\text{COCD}_3$ , 298 K) of one-clicked mint green fluorescent compound **7**.

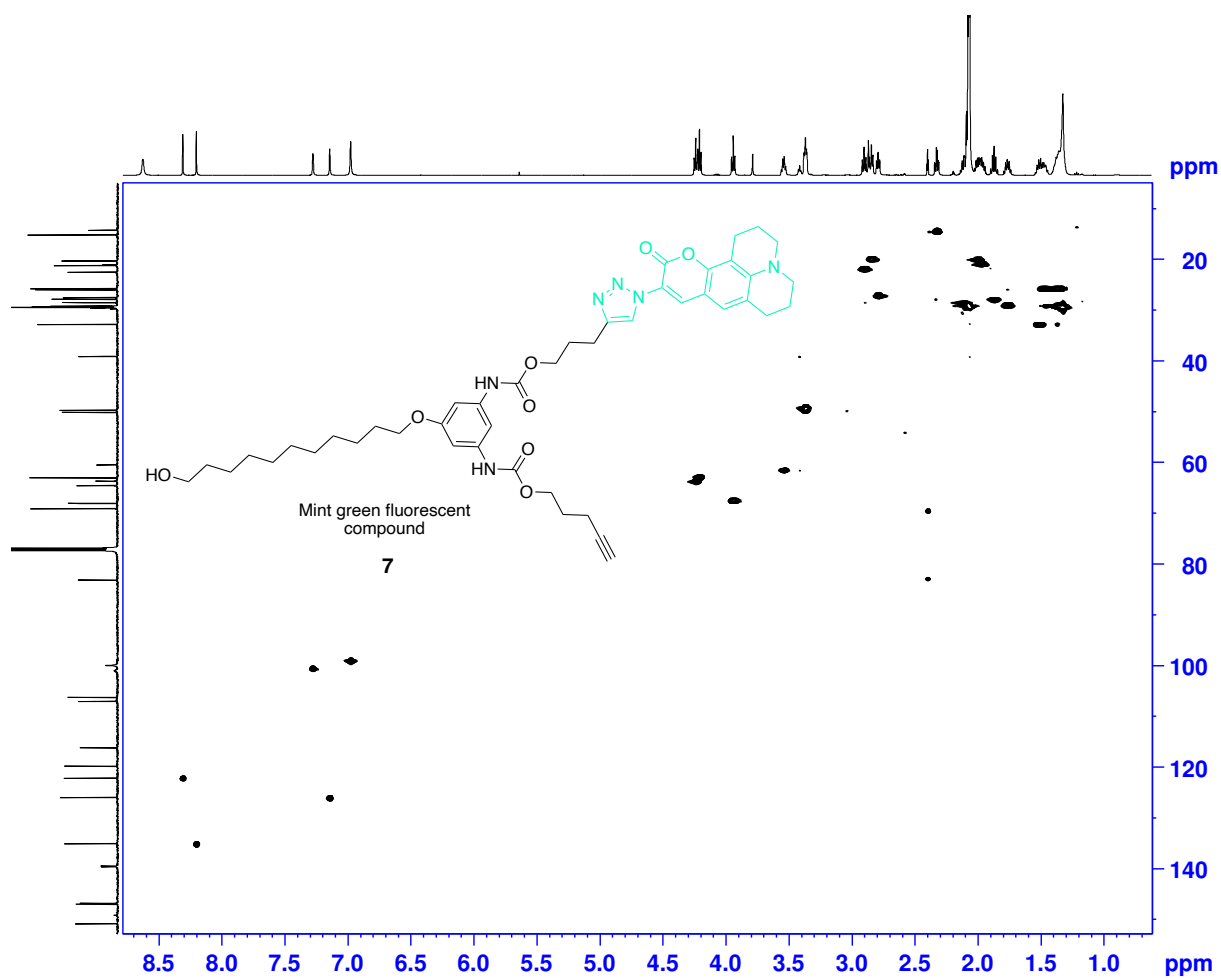

**Figure S13.** HSQC ( $^1\text{H}$ - $^{13}\text{C}$ ) spectrum (500 MHz,  $\text{CD}_3\text{COCD}_3$ , 298 K) of one-clicked mint green fluorescent compound **7**.

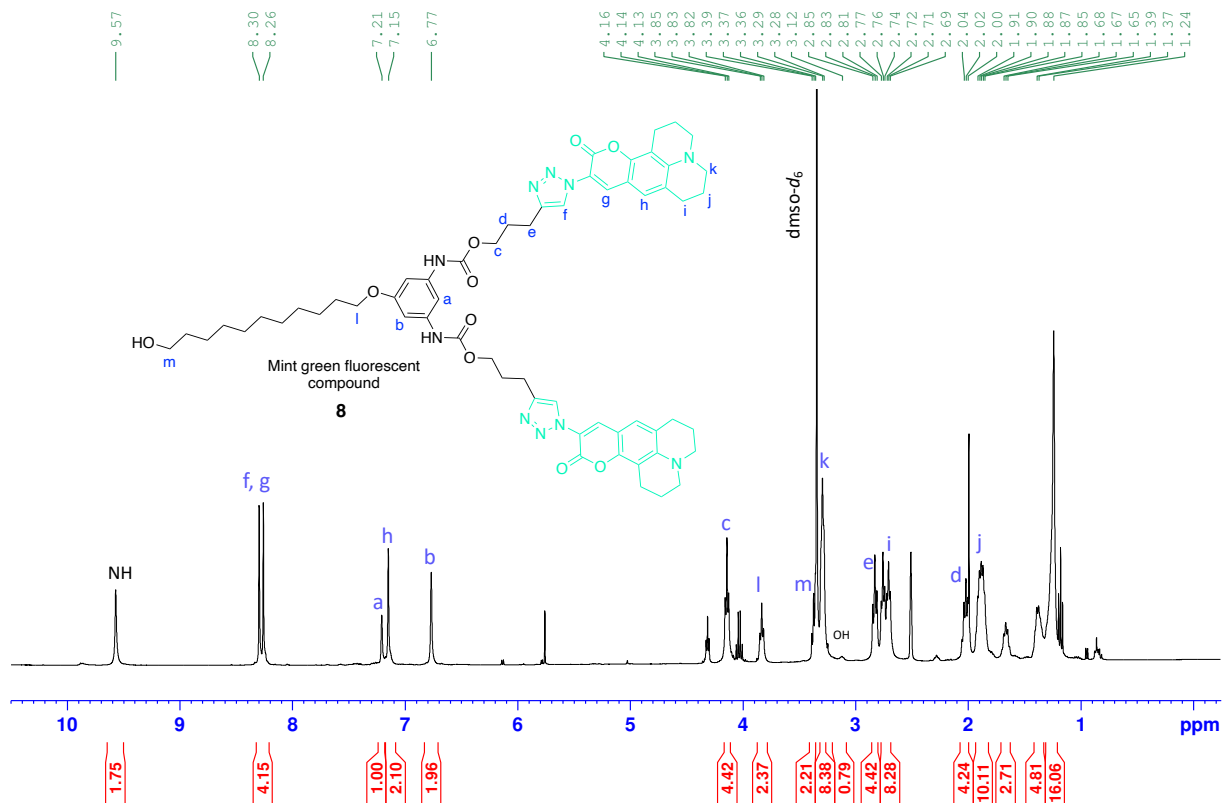

**Figure S14.**  $^1\text{H}$  NMR spectrum (400 MHz,  $\text{CD}_3\text{SOCD}_3$ , 298 K) of mint green fluorescing compound **8**.

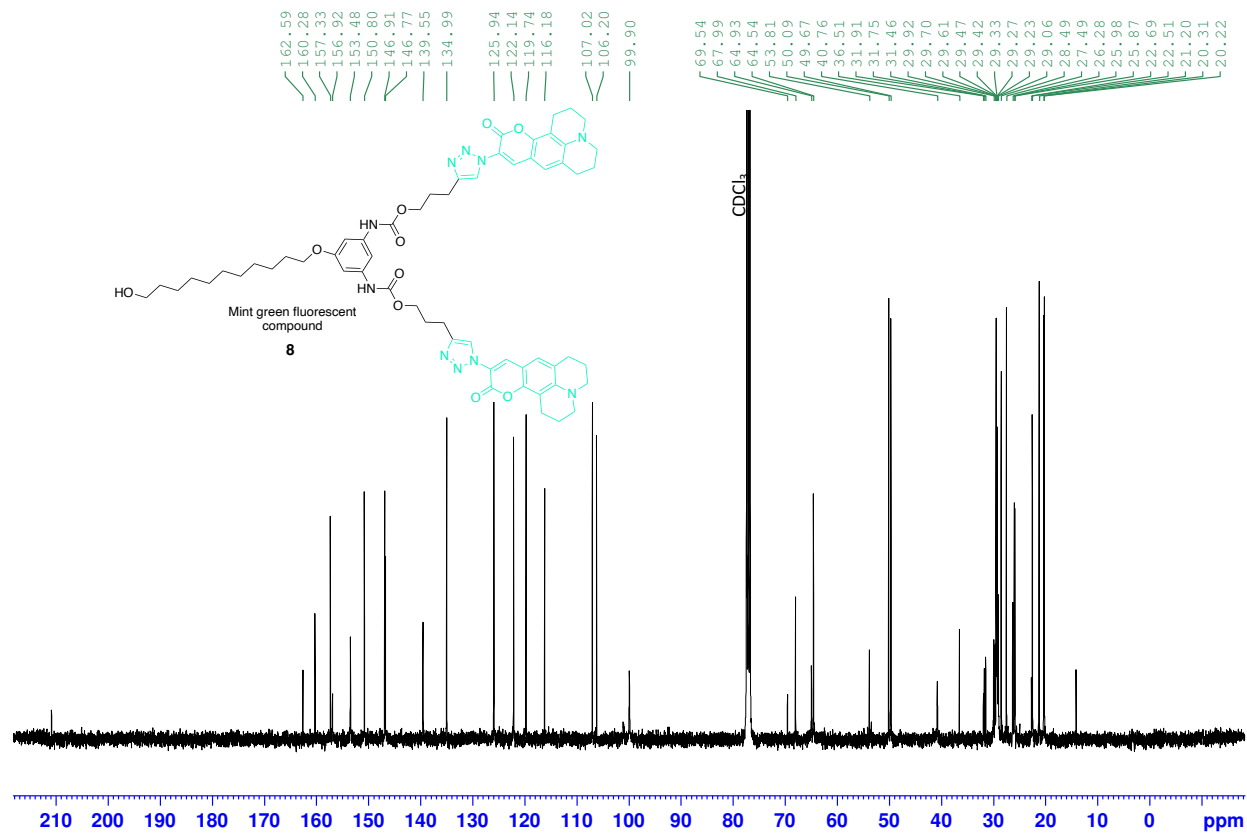

**Figure S15.** <sup>13</sup>C NMR spectrum (101 MHz, CDCl<sub>3</sub>, 298 K) of minet green fluorescing compound **8**.

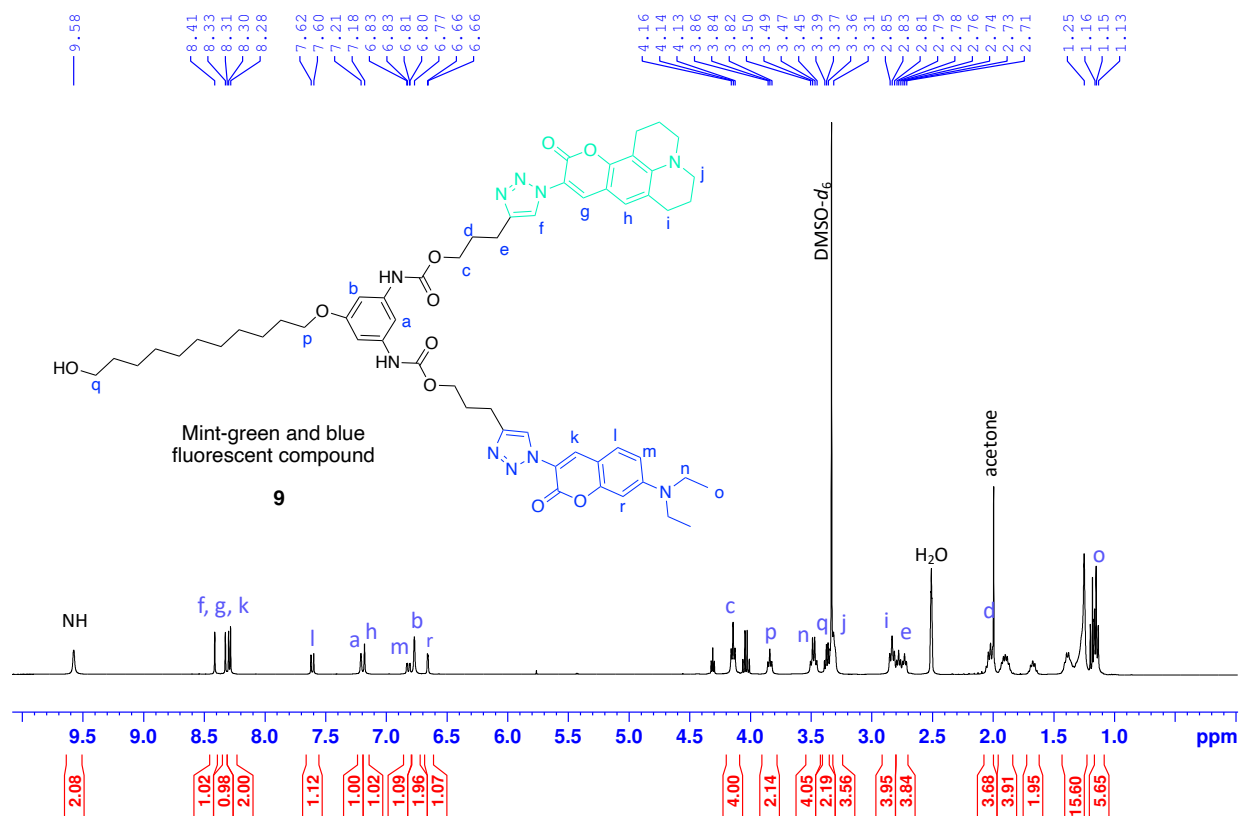

**Figure S16.** <sup>1</sup>H NMR spectrum (400 MHz, CD<sub>3</sub>SOCD<sub>3</sub>, 298 K) of blue and mint green fluorescing compound **9**.



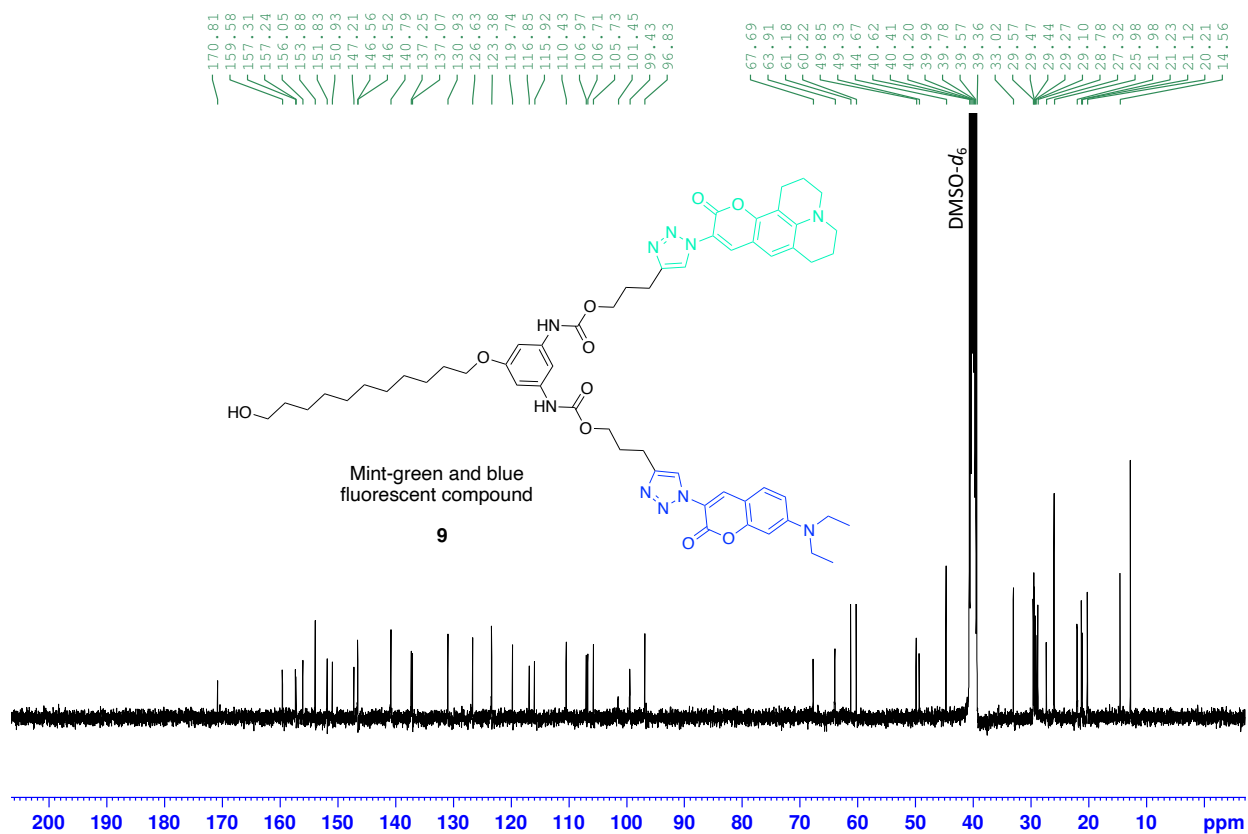

**Figure S17.**  $^{13}\text{C}$  NMR spectrum (101 MHz,  $\text{CD}_3\text{SOCD}_3$ , 298 K) of blue and mint green fluorescing compound **9**.

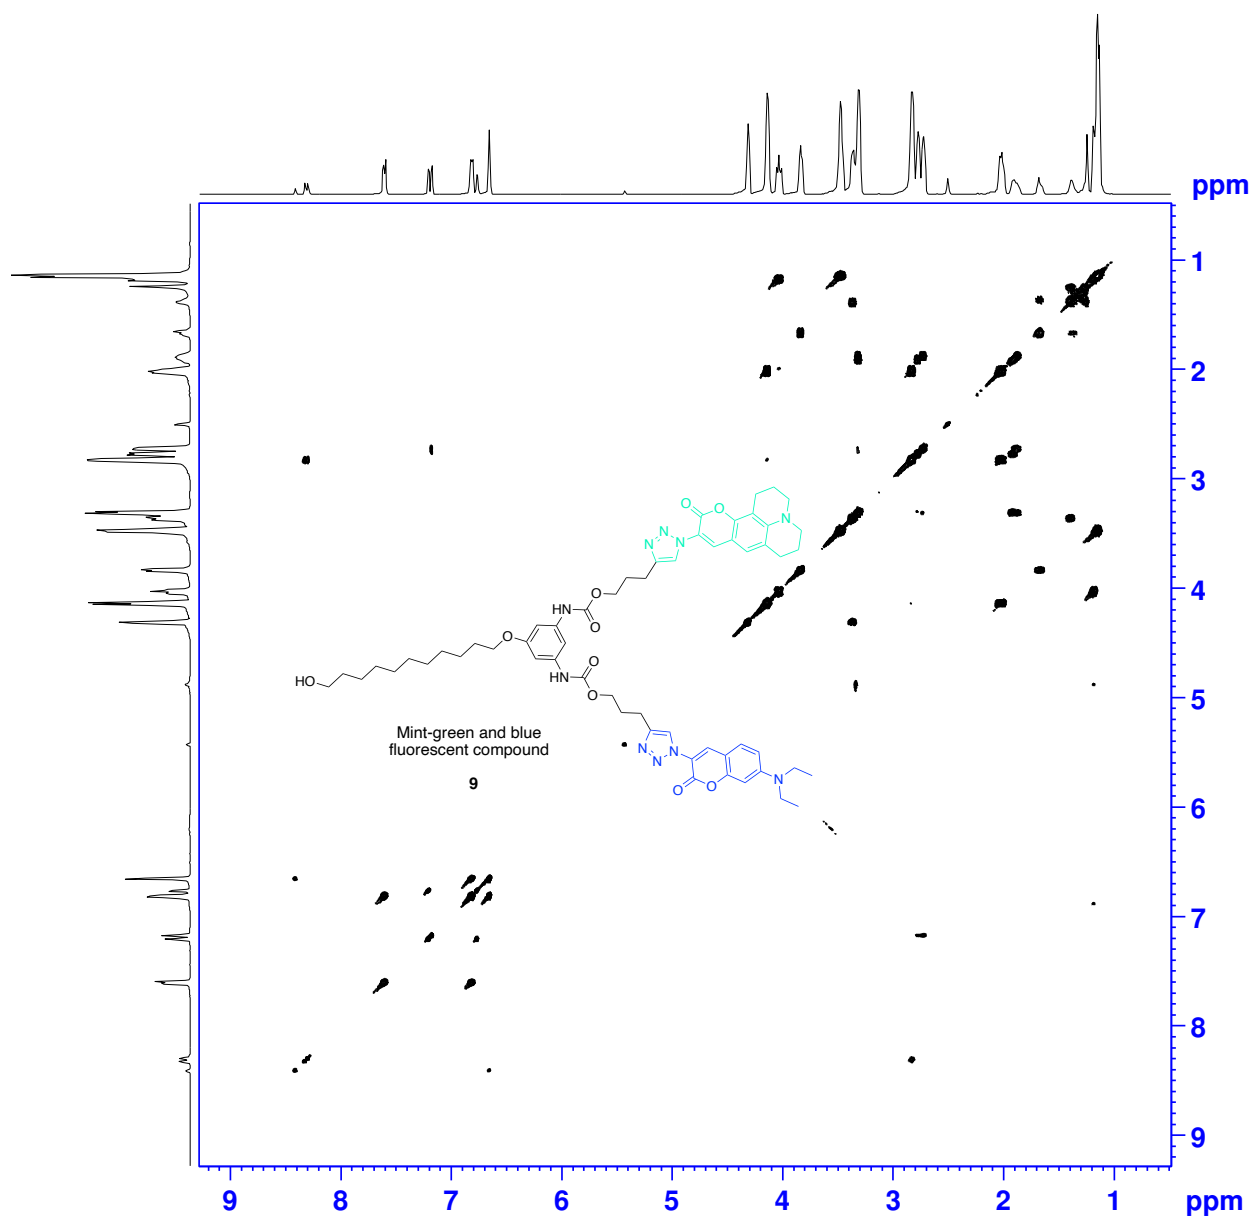

**Figure S18.** COSY ( $^1\text{H}$ - $^1\text{H}$ ) spectrum (400 MHz,  $\text{CD}_3\text{SOCD}_3$ , 298 K) of blue and mint green fluorescing compound **9**.

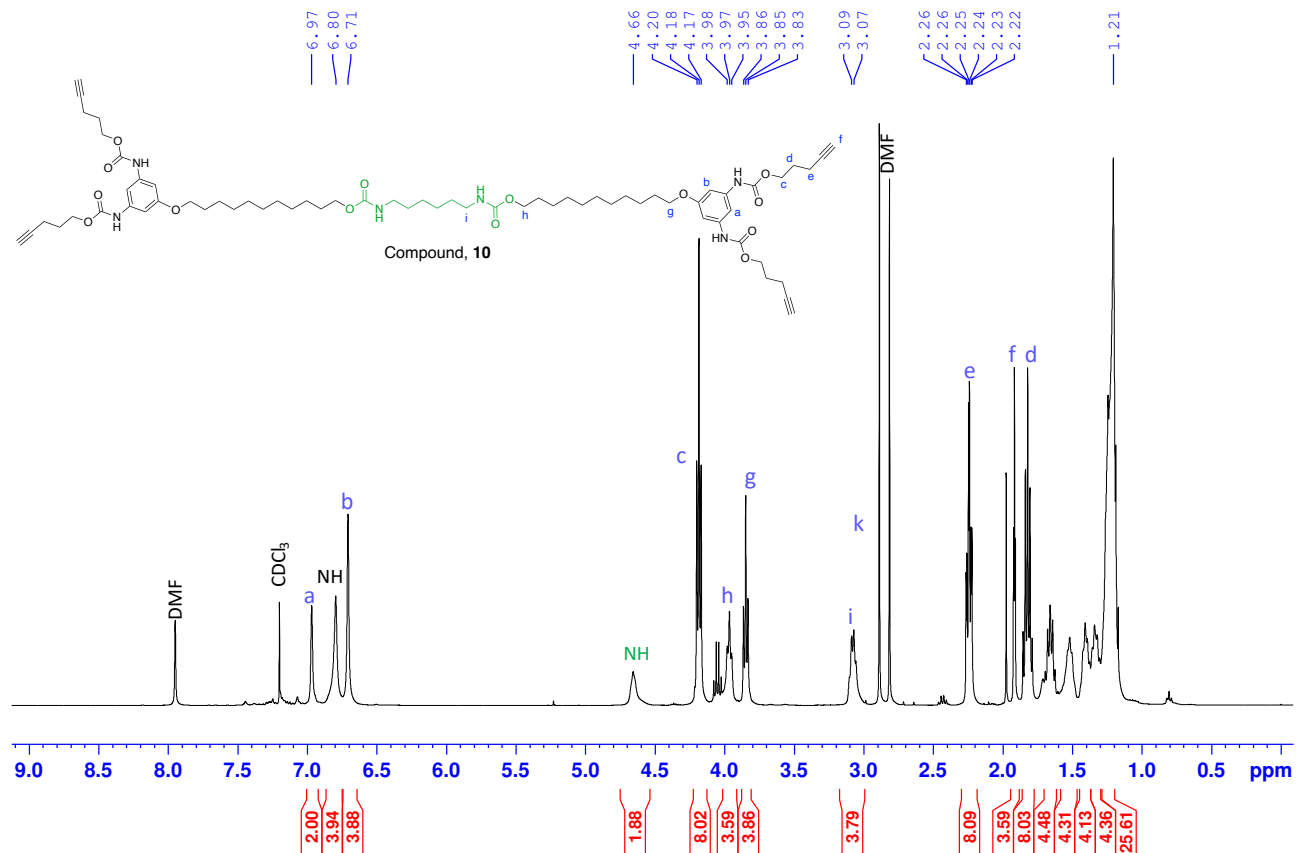

**Figure S19.**  $^1\text{H}$  NMR spectrum (400 MHz,  $\text{CDCl}_3$ , 298 K) of compound **10**.

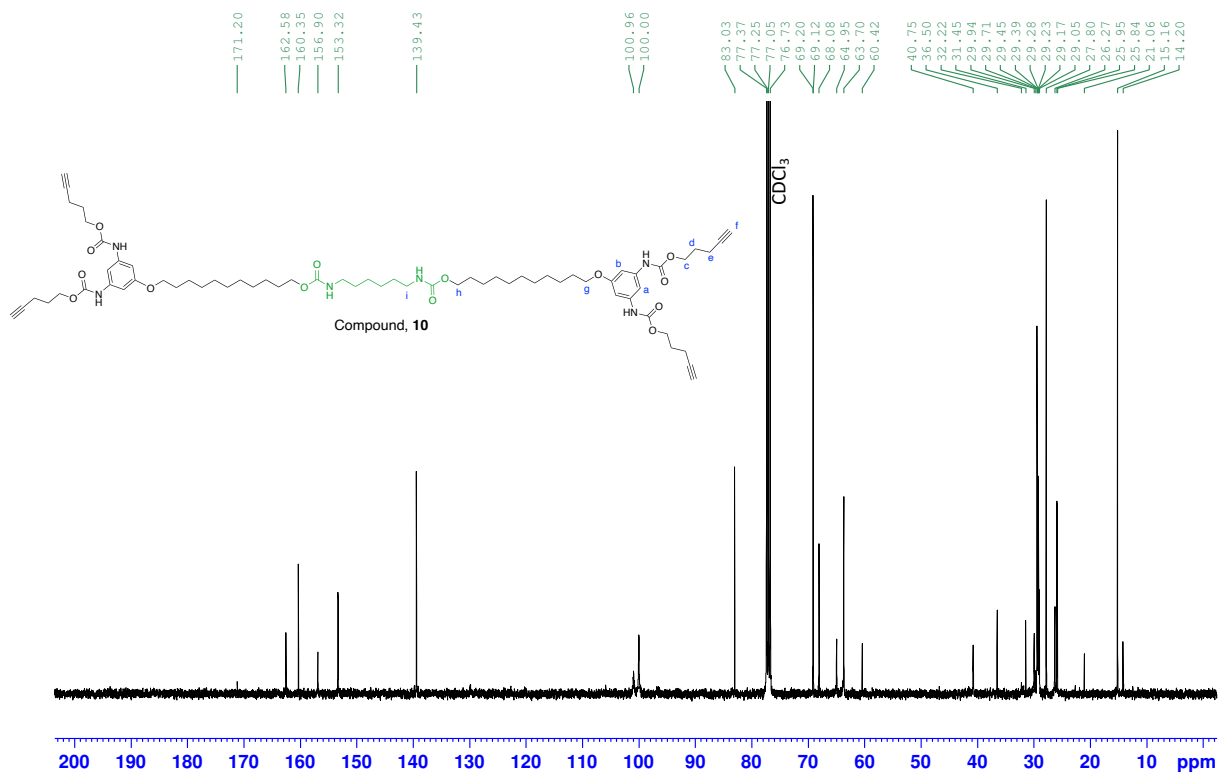

**Figure S20.** <sup>13</sup>C NMR spectrum (101 MHz, CDCl<sub>3</sub>, 298 K) of compound **10**.

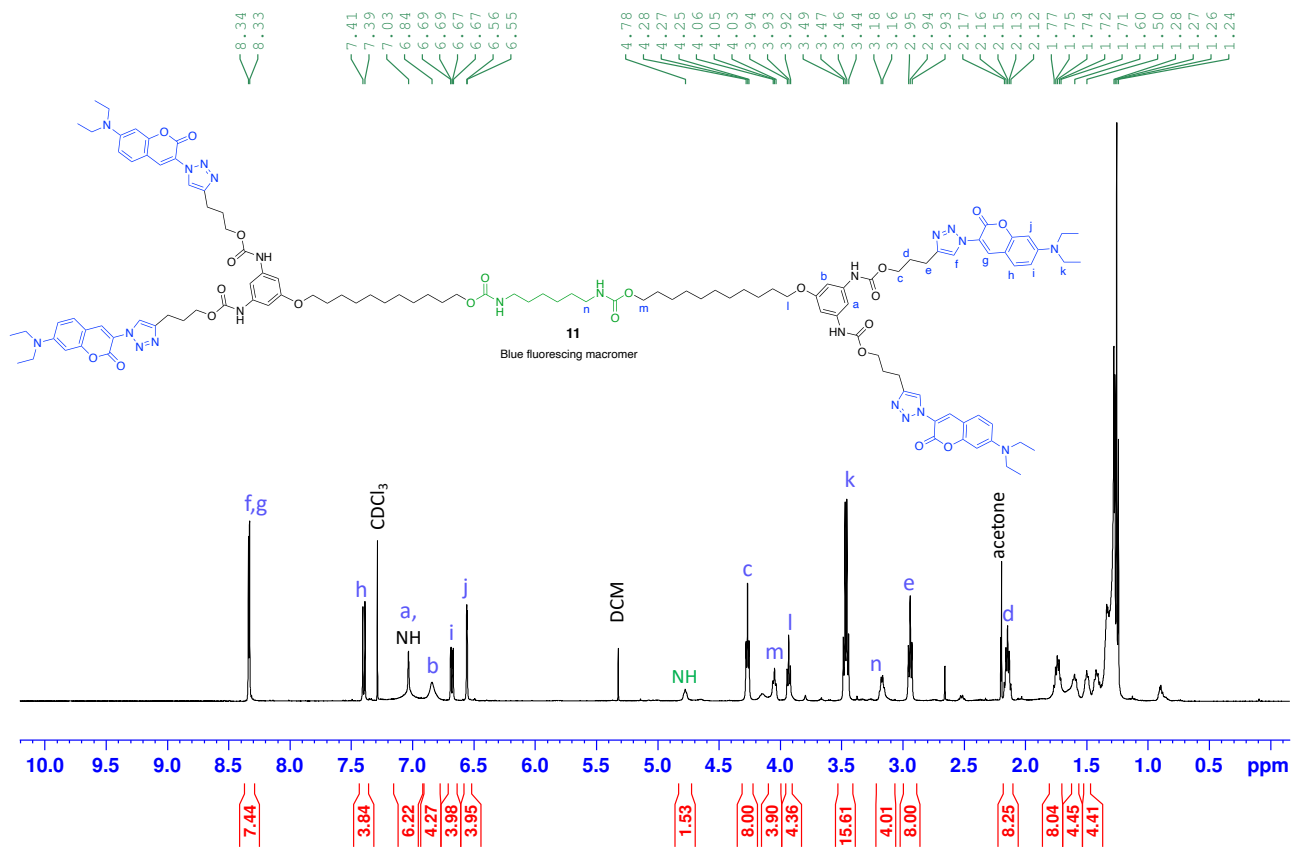

**Figure S21.** <sup>1</sup>H NMR spectrum (400 MHz, CDCl<sub>3</sub>, 298 K) of blue fluorescent dendrimer **11**.

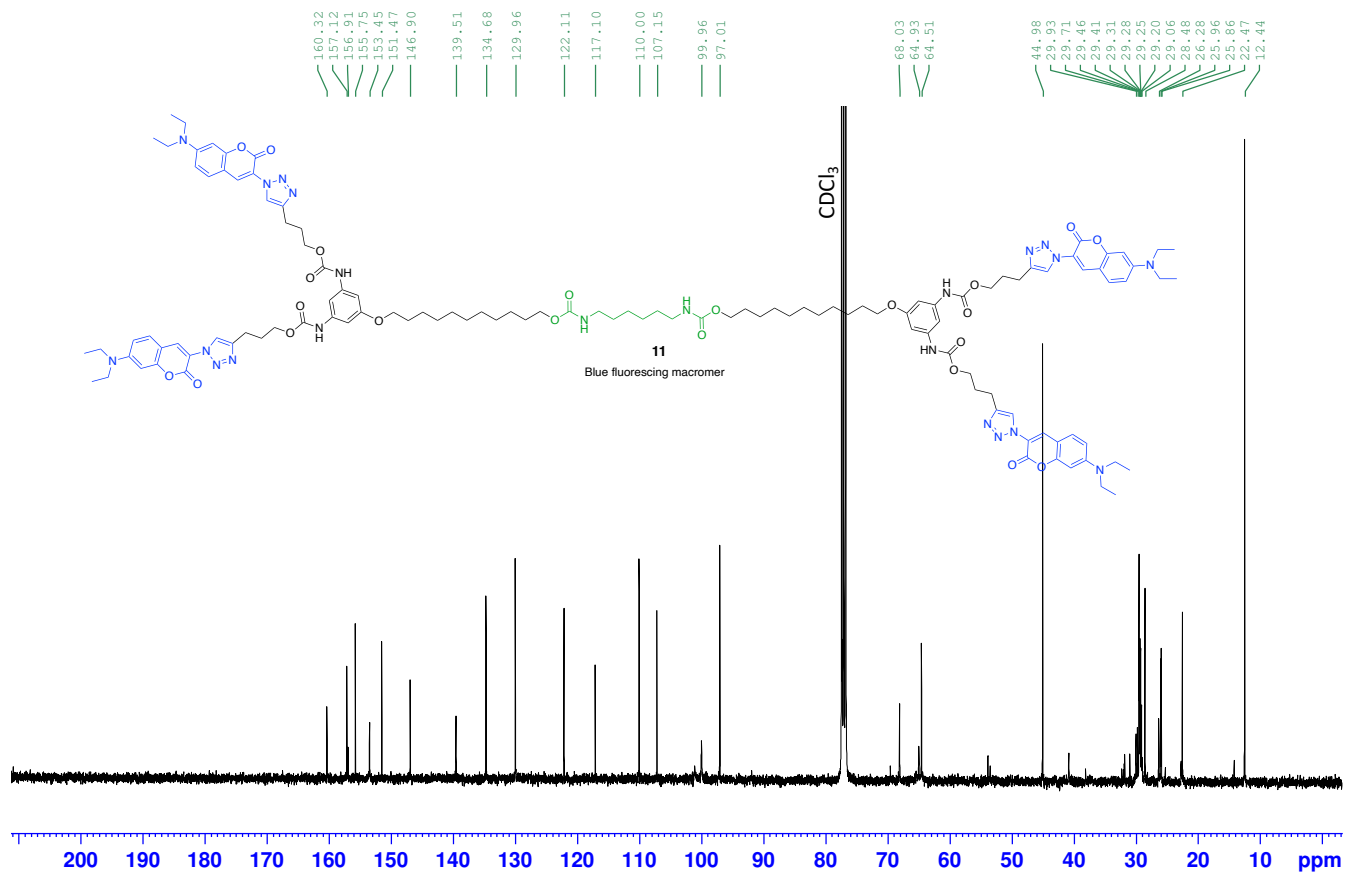

**Figure S22.**  $^{13}\text{C}$  NMR spectrum (101 MHz,  $\text{CDCl}_3$ , 298 K) of blue fluorescent dendrimer **11**.

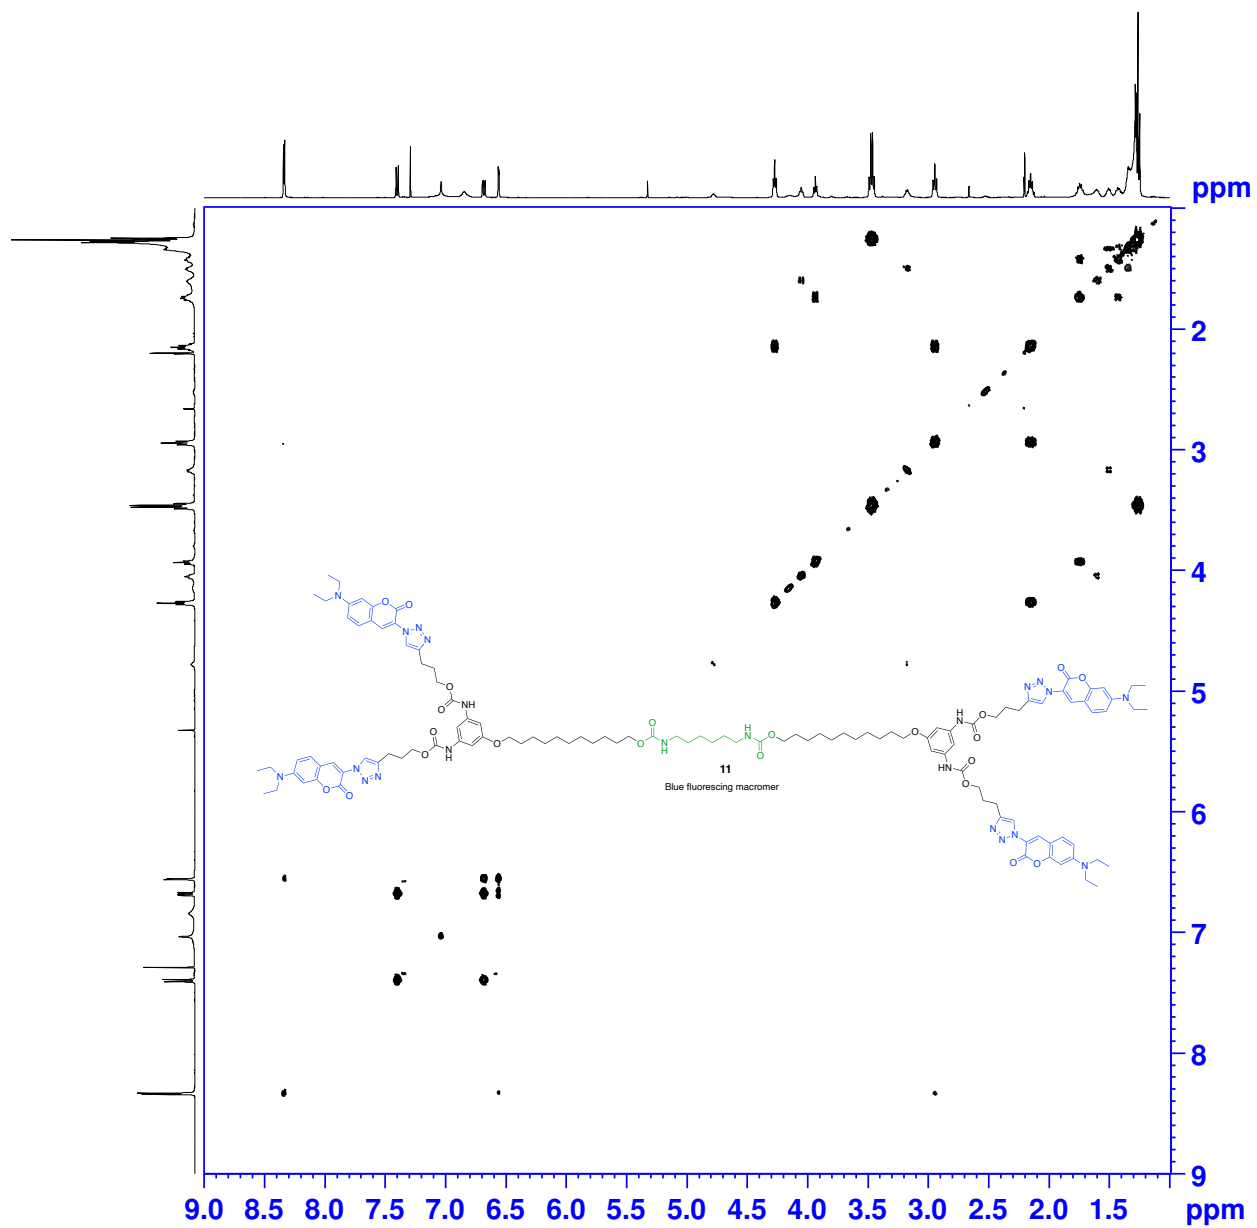

**Figure S23.** COSY ( $^1\text{H}$ - $^1\text{H}$ ) spectrum (400 MHz,  $\text{CDCl}_3$ , 298 K) of blue fluorescing dendrimer **11**.

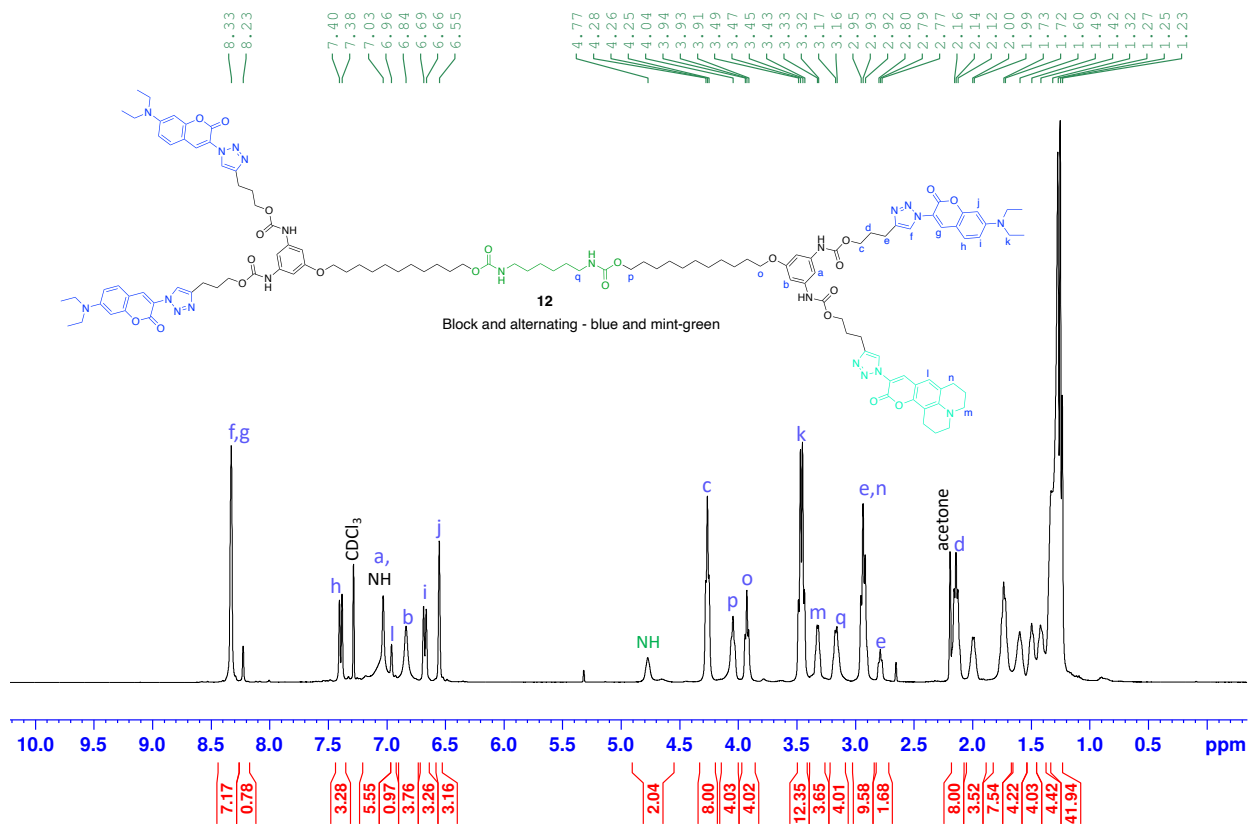

**Figure S24.**  $^1\text{H}$  NMR spectrum (400 MHz,  $\text{CDCl}_3$ , 298 K) of blue and mint green fluorescing dendrimer **12**.



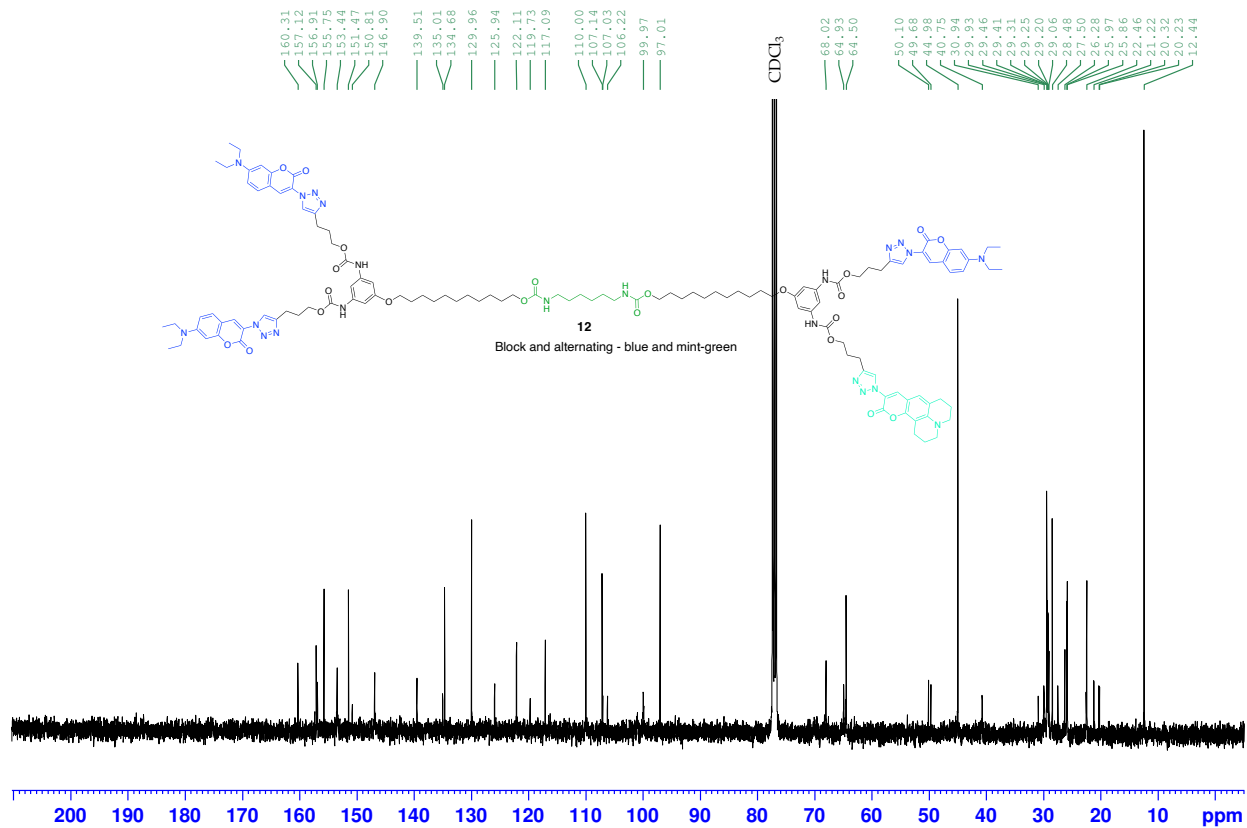

**Figure S25.**  $^{13}\text{C}$  NMR spectrum (101 MHz,  $\text{CDCl}_3$ , 298 K) of blue and mint green fluorescing dendrimer **12**.

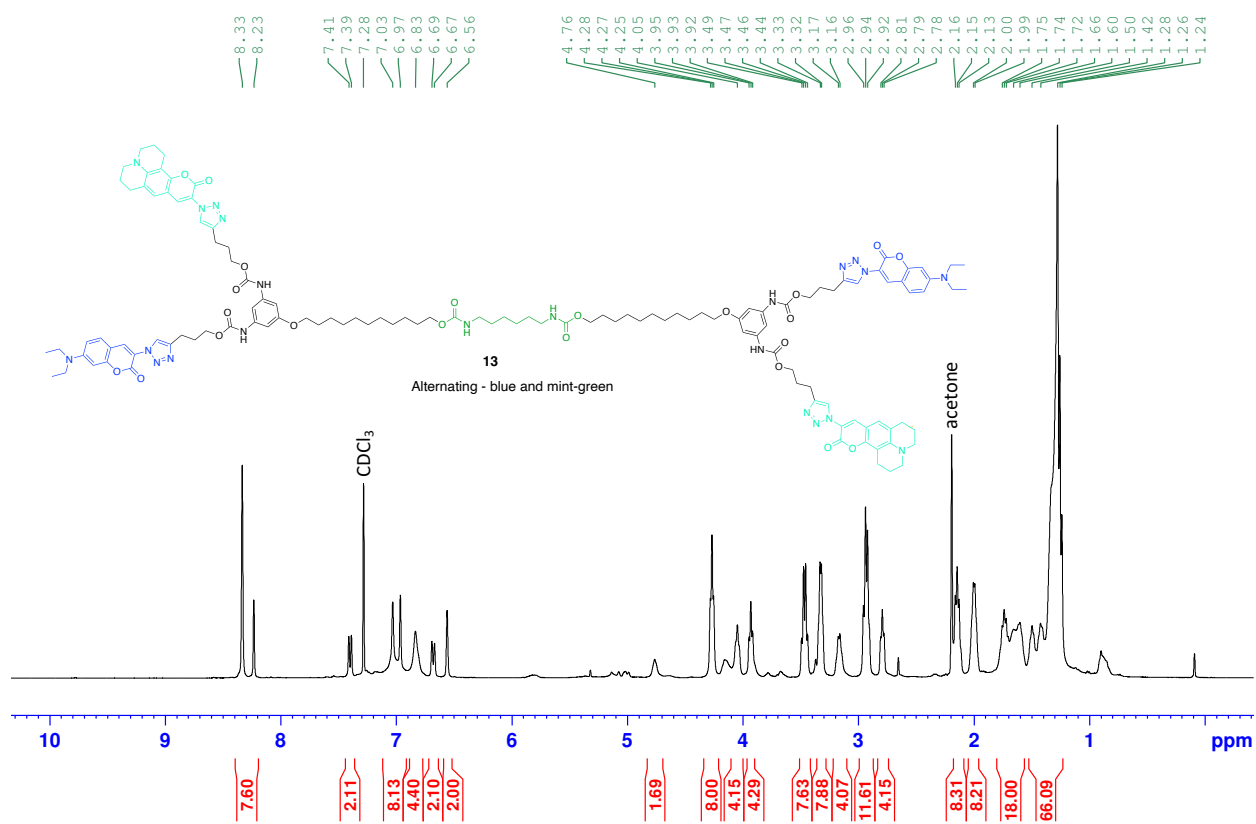

**Figure S26.** <sup>1</sup>H spectrum (400 MHz, CDCl<sub>3</sub>, 298 K) of alternating blue and mint green fluorescing dendrimer **13**.

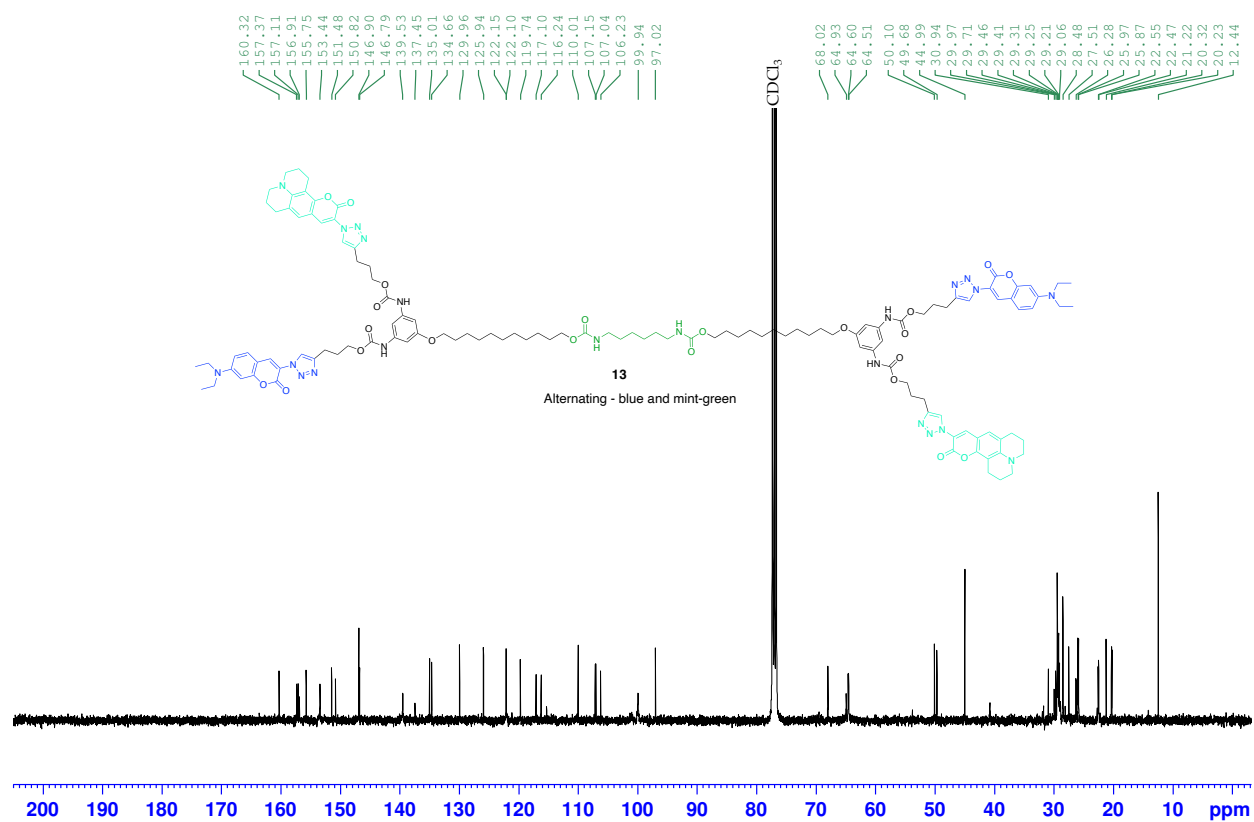

**Figure S27.**  $^{13}\text{C}$  spectrum (101 MHz,  $\text{CDCl}_3$ , 298 K) of alternating blue and mint green fluorescing dendrimer **13**.

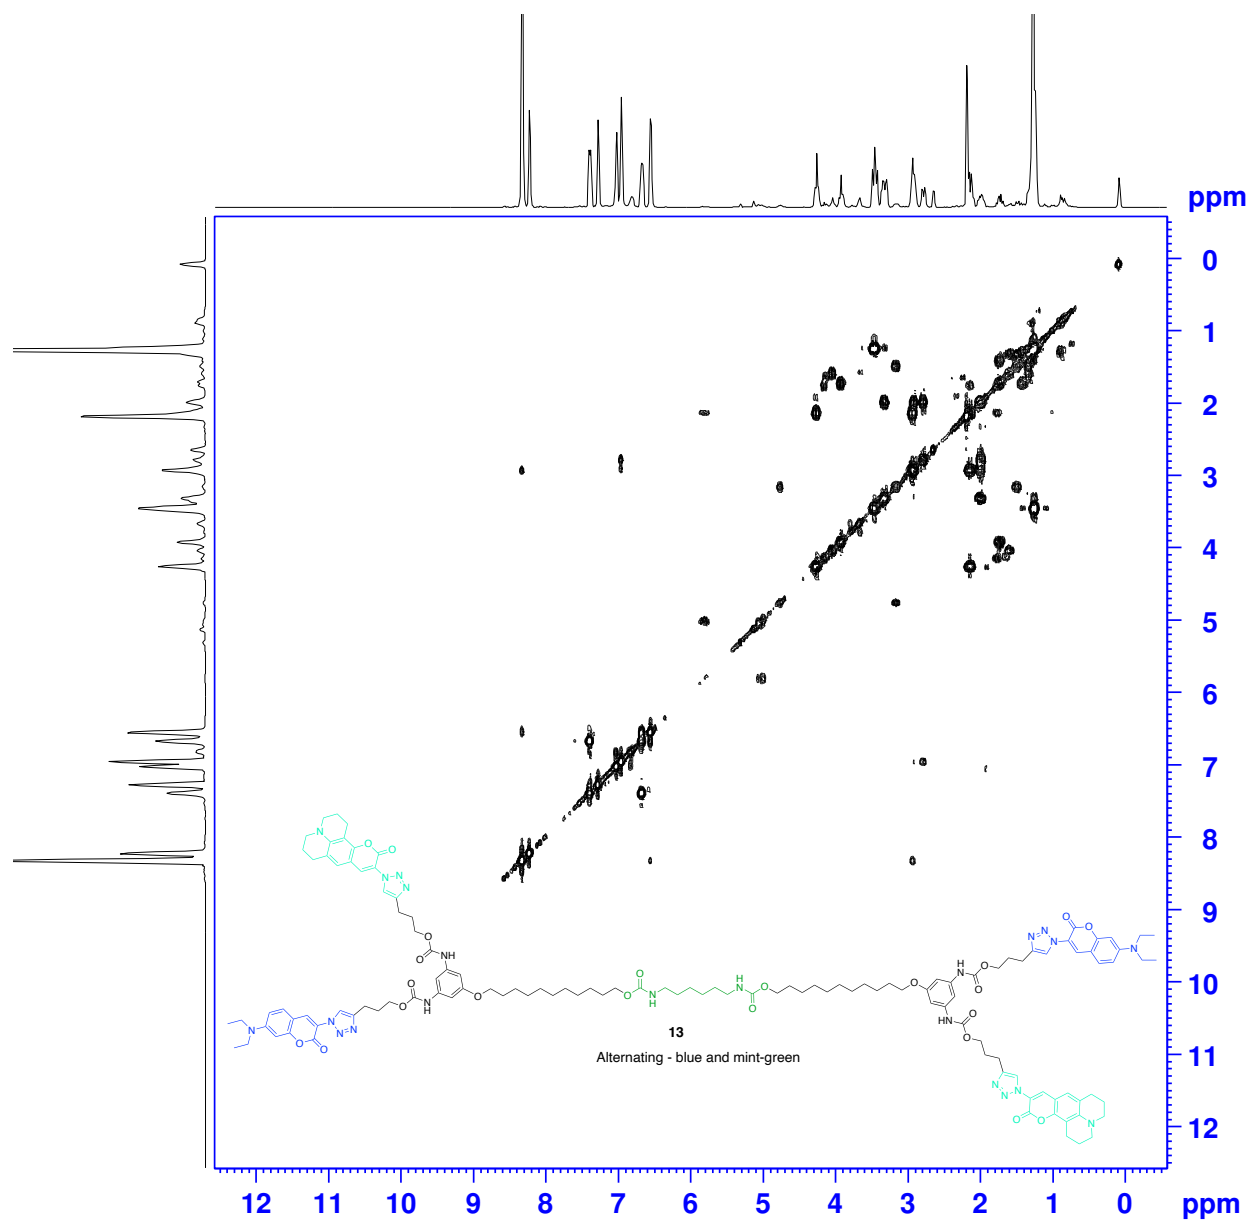

**Figure S28.** COSY ( $^1\text{H}$ - $^1\text{H}$ ) spectrum (400 MHz,  $\text{CDCl}_3$ , 298 K) of alternating blue and mint green fluorescing dendrimer **13**.

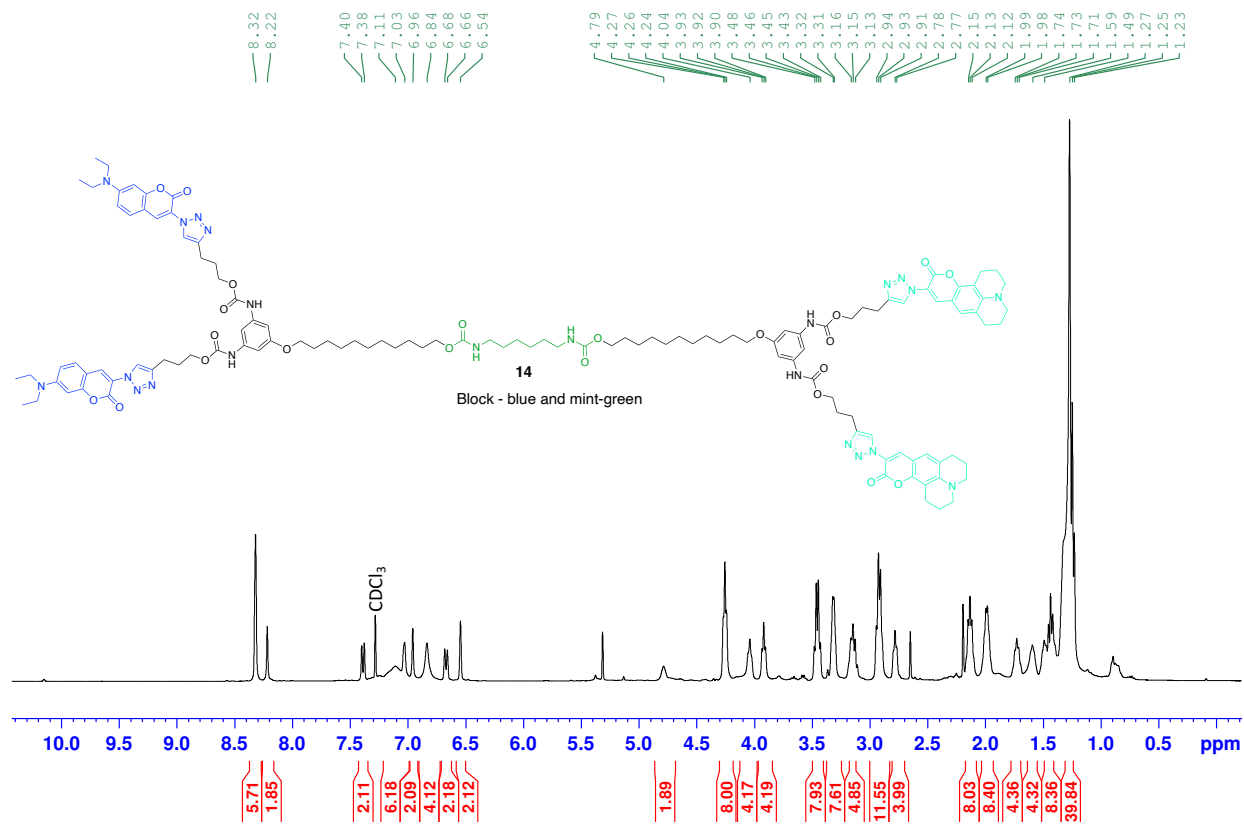

**Figure S29.** <sup>1</sup>H spectrum (400 MHz, CDCl<sub>3</sub>, 298 K) of block blue and mint green fluorescing dendrimer **14**.

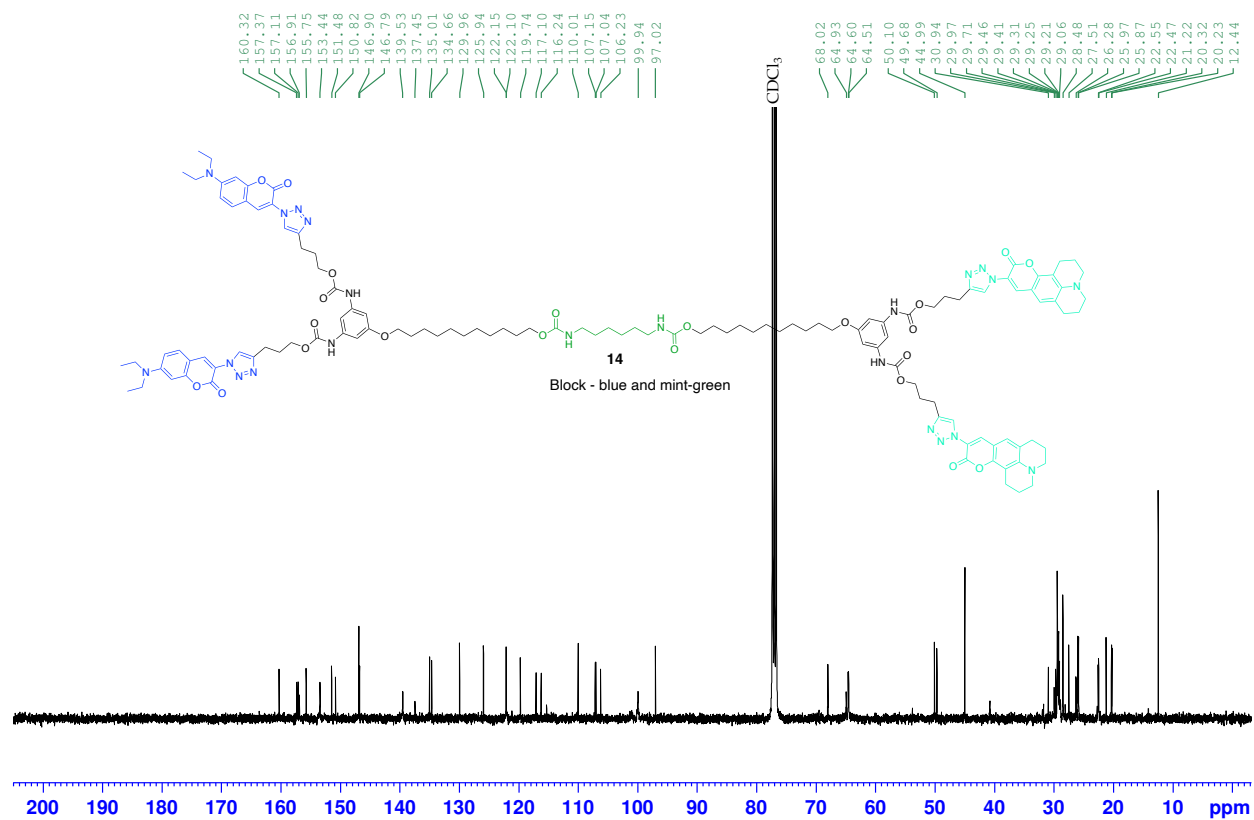

**Figure S30.** <sup>13</sup>C spectrum (101 MHz, CDCl<sub>3</sub>, 298 K) of block blue and mint green fluorescing dendrimer **14**.

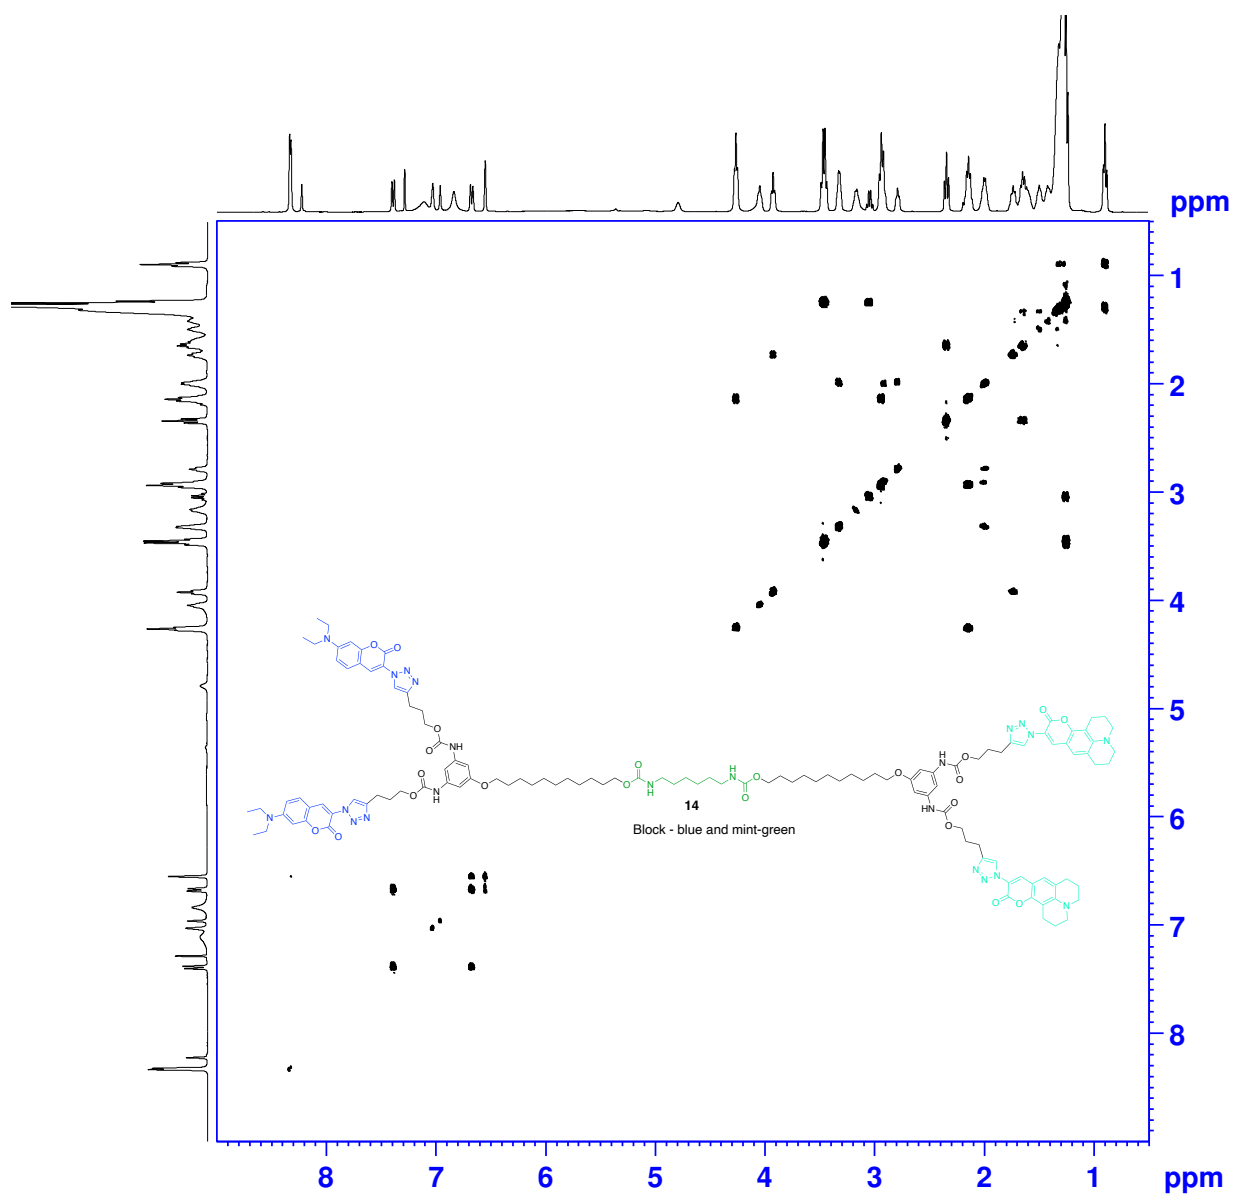

**Figure S31.** COSY ( $^1\text{H}$ - $^1\text{H}$ ) spectrum (400 MHz,  $\text{CDCl}_3$ , 298 K) of block blue and mint green fluorescing dendrimer **14**.

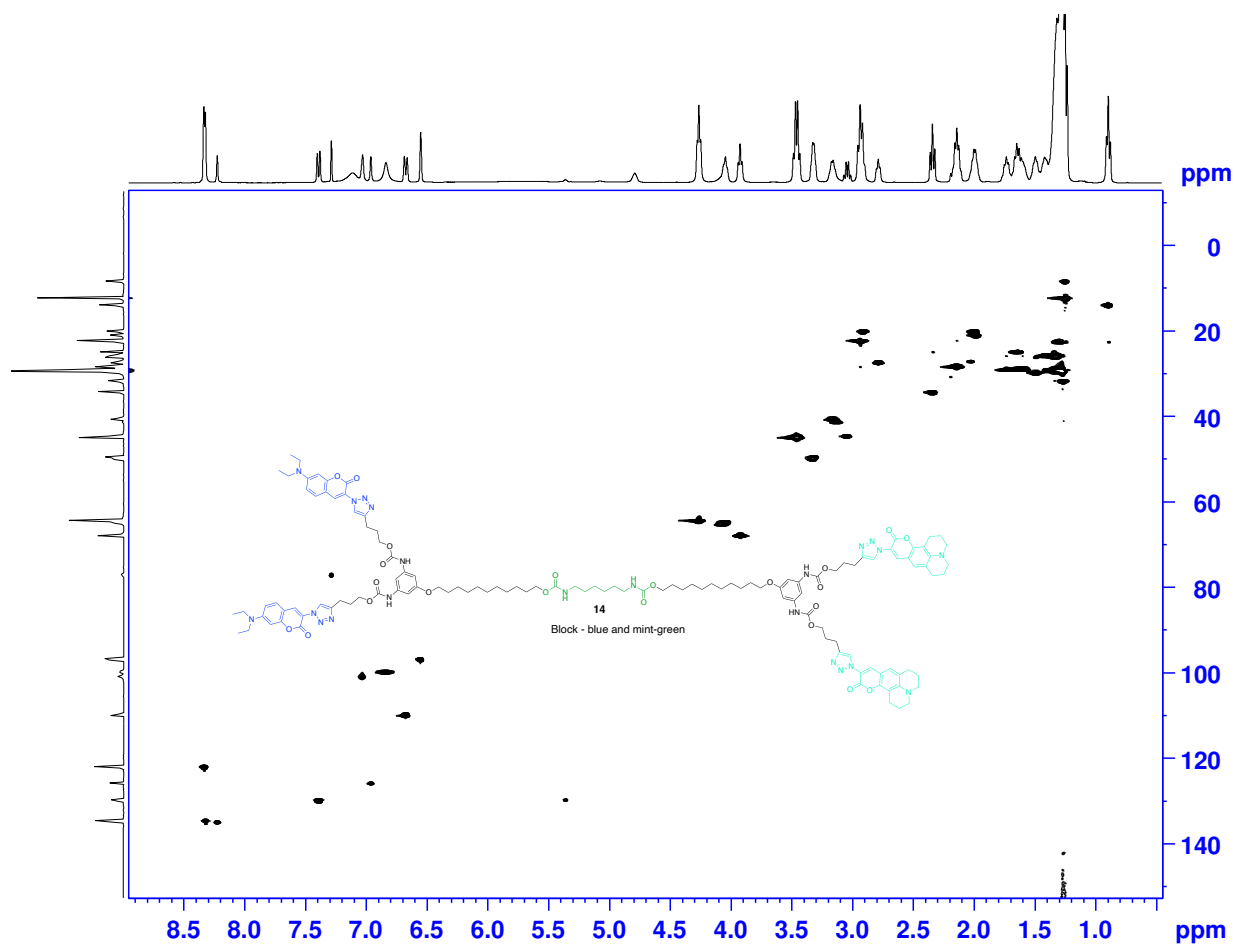

**Figure S32.** HSQC ( $^1\text{H}$ - $^{13}\text{C}$ ) spectrum (400 MHz,  $\text{CDCl}_3$ , 298 K) of blue and mint green (block) fluorescing dendrimer **14**.



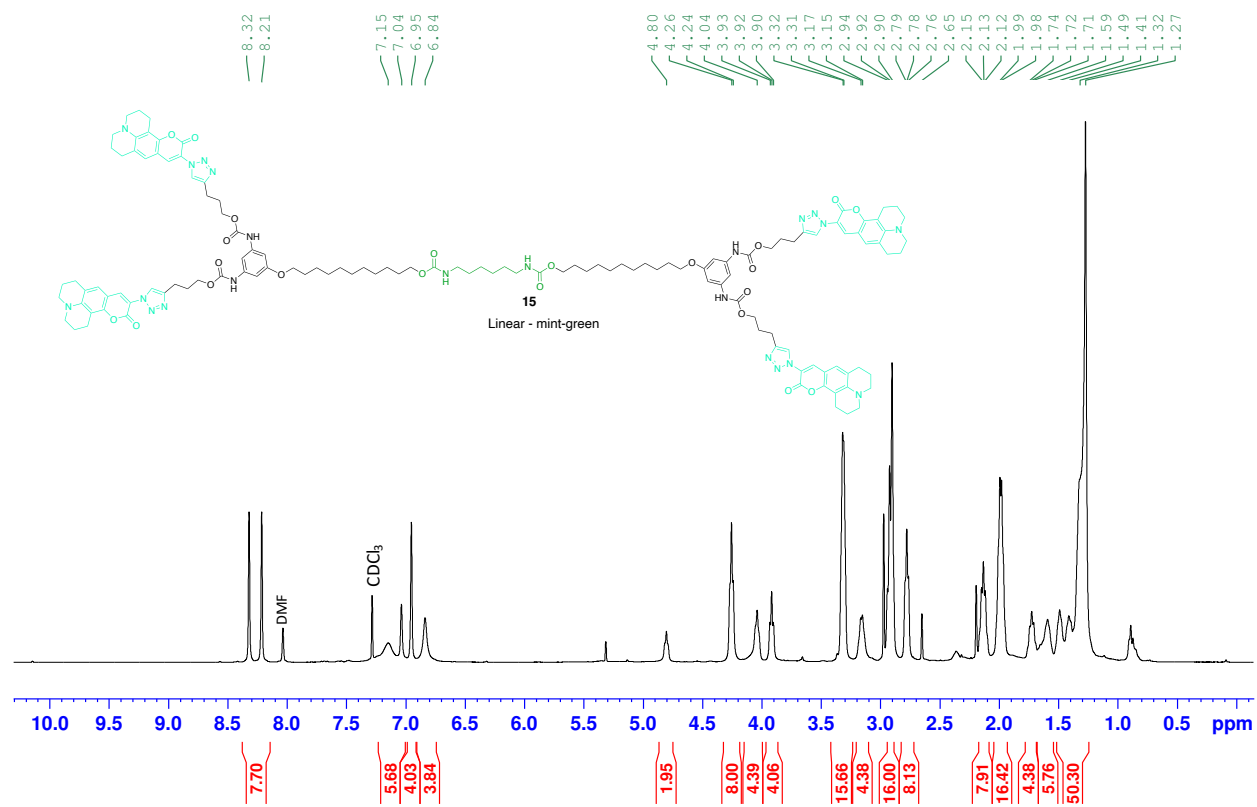

**Figure S33.** <sup>1</sup>H spectrum (400 MHz, CDCl<sub>3</sub>, 298 K) of mint green fluorescing dendrimer **15**.

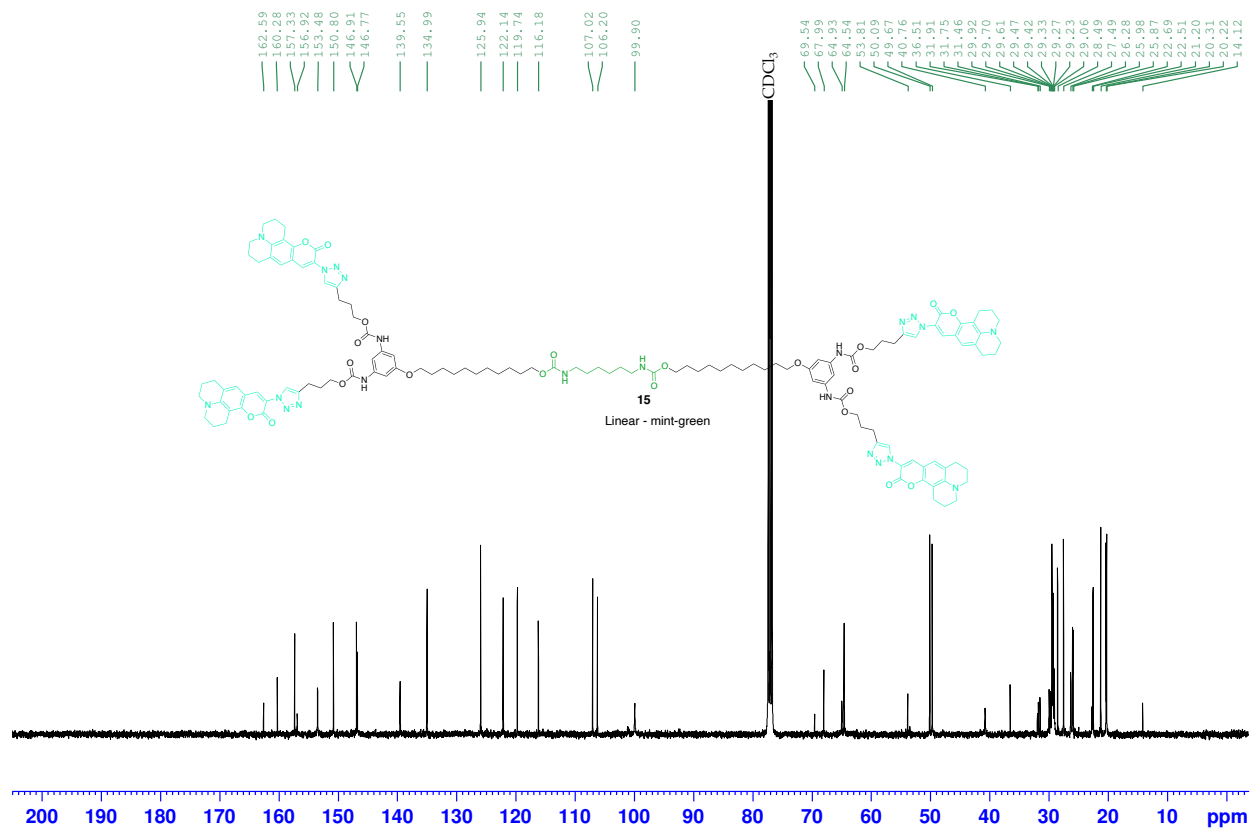

**Figure S34.** <sup>13</sup>C spectrum (101 MHz, CDCl<sub>3</sub>, 298 K) of mint green fluorescing dendrimer **15**.

### 3. Mass spectra of synthesized compounds

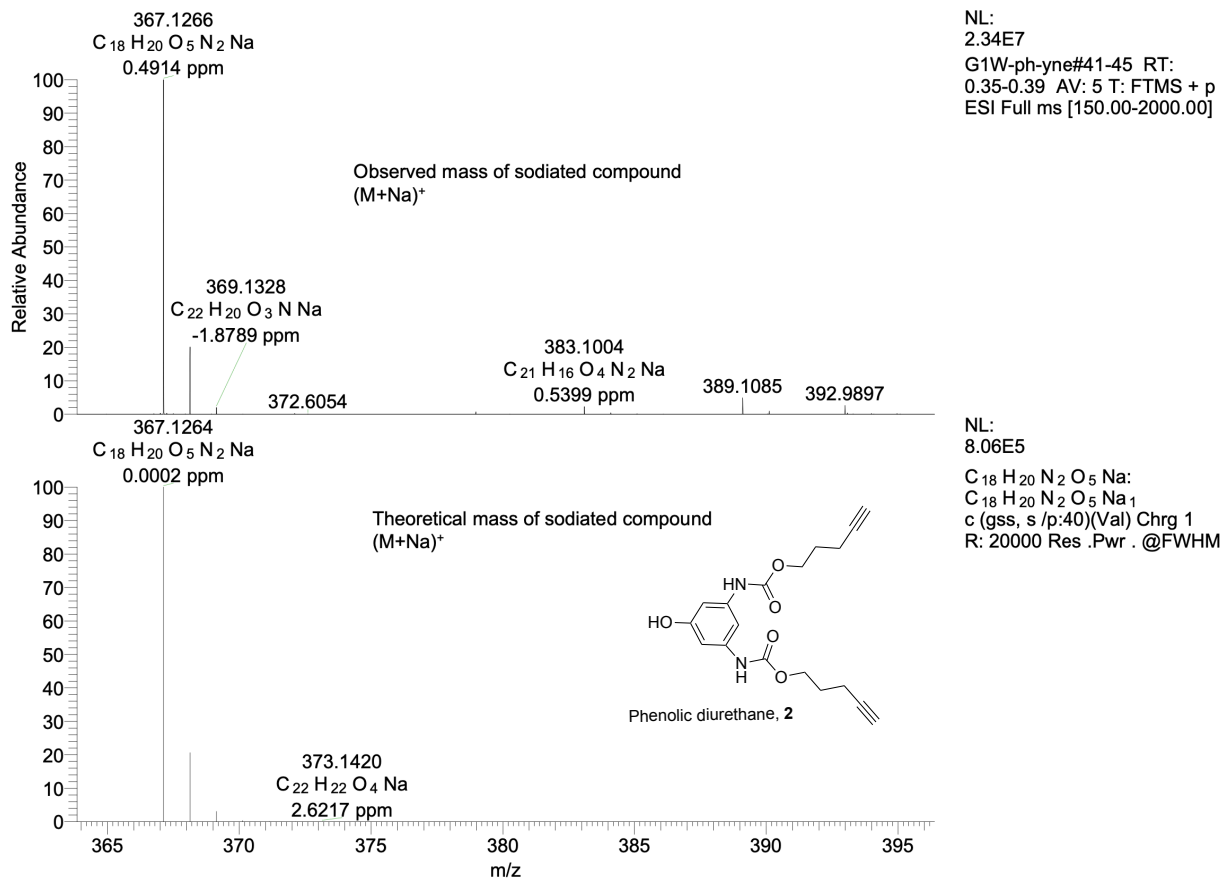

**Figure S35.** HRMS (ESI-LTQ-Orbitrap) spectrum of phenolic diurethane 2.

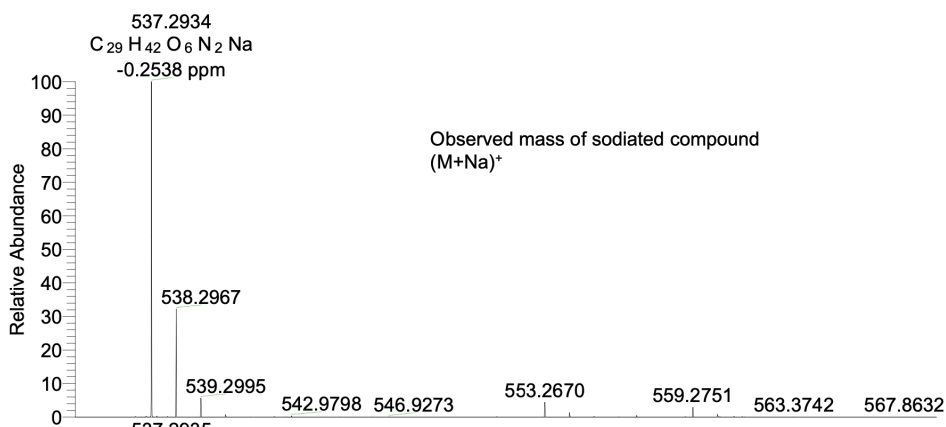

NL:  
2.89E7  
G1W-yne#45-51 RT:  
0.38-0.44 AV: 7 T: FTMS + p  
ESI Full ms [150.00-2000.00]

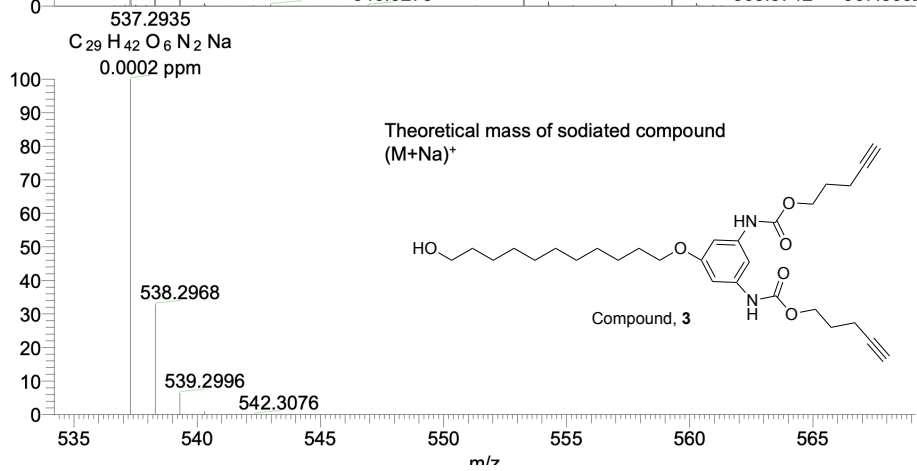

NL:  
7.13E5  
C<sub>29</sub>H<sub>42</sub>N<sub>2</sub>O<sub>6</sub>Na:  
C<sub>29</sub>H<sub>42</sub>N<sub>2</sub>O<sub>6</sub>Na<sub>1</sub>  
c (gss, s /p:40)(Val) Chrg 1  
R: 20000 Res .Pwr . @FWHM

**Figure S36.** HRMS (ESI-LTQ-Orbitrap) spectrum of compound 3.

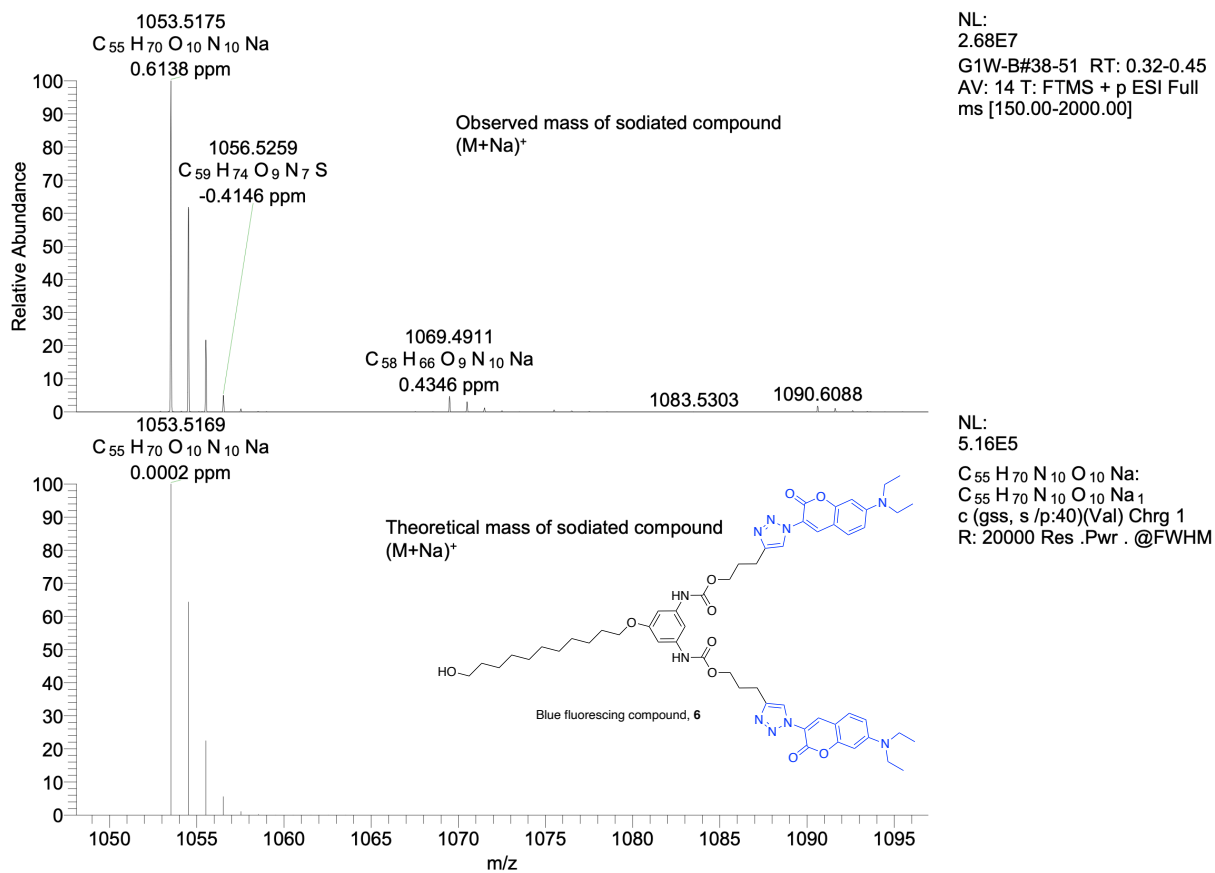

**Figure S37.** HRMS (ESI-LTQ-Orbitrap) blue fluorescing compound **6**.

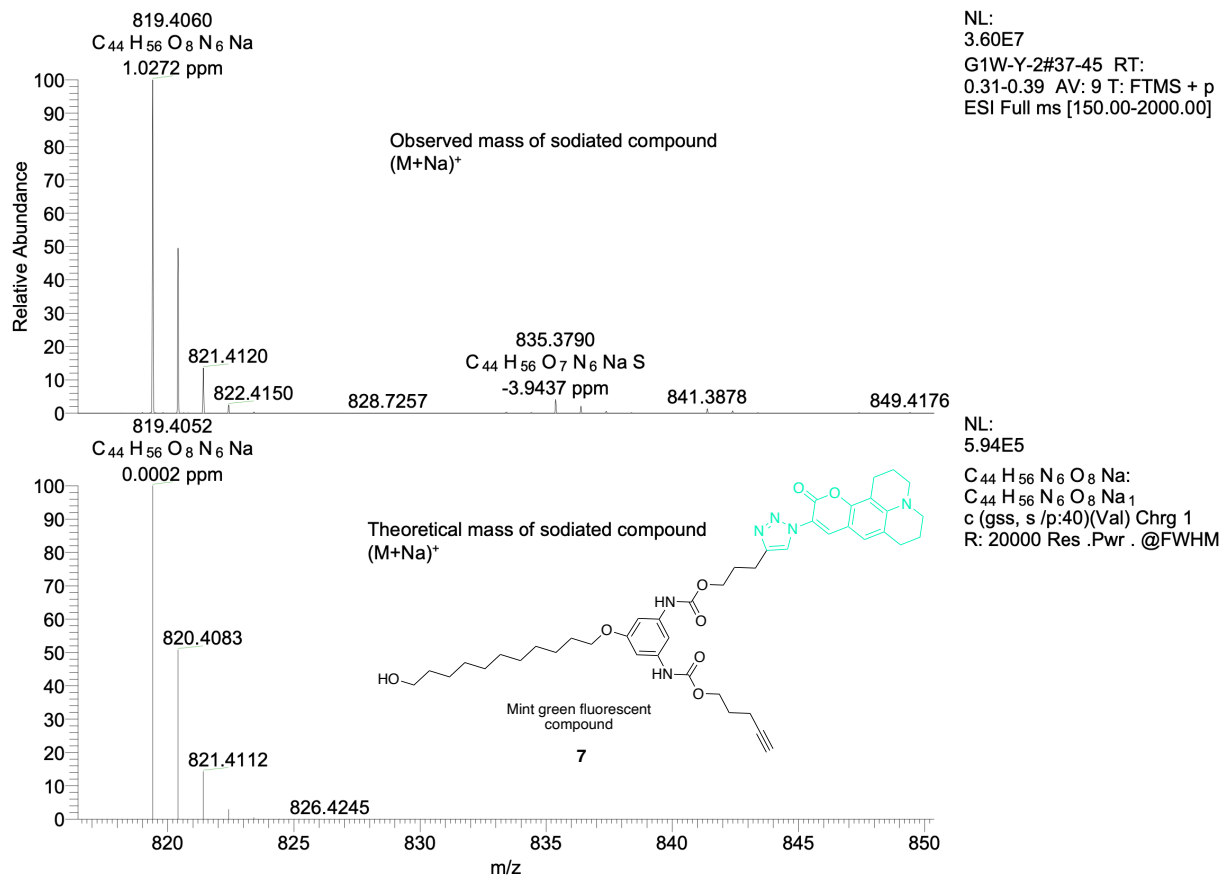

**Figure S38.** HRMS (ESI-LTQ-Orbitrap) spectrum of one-clicked mint green fluorescing compound **7**.

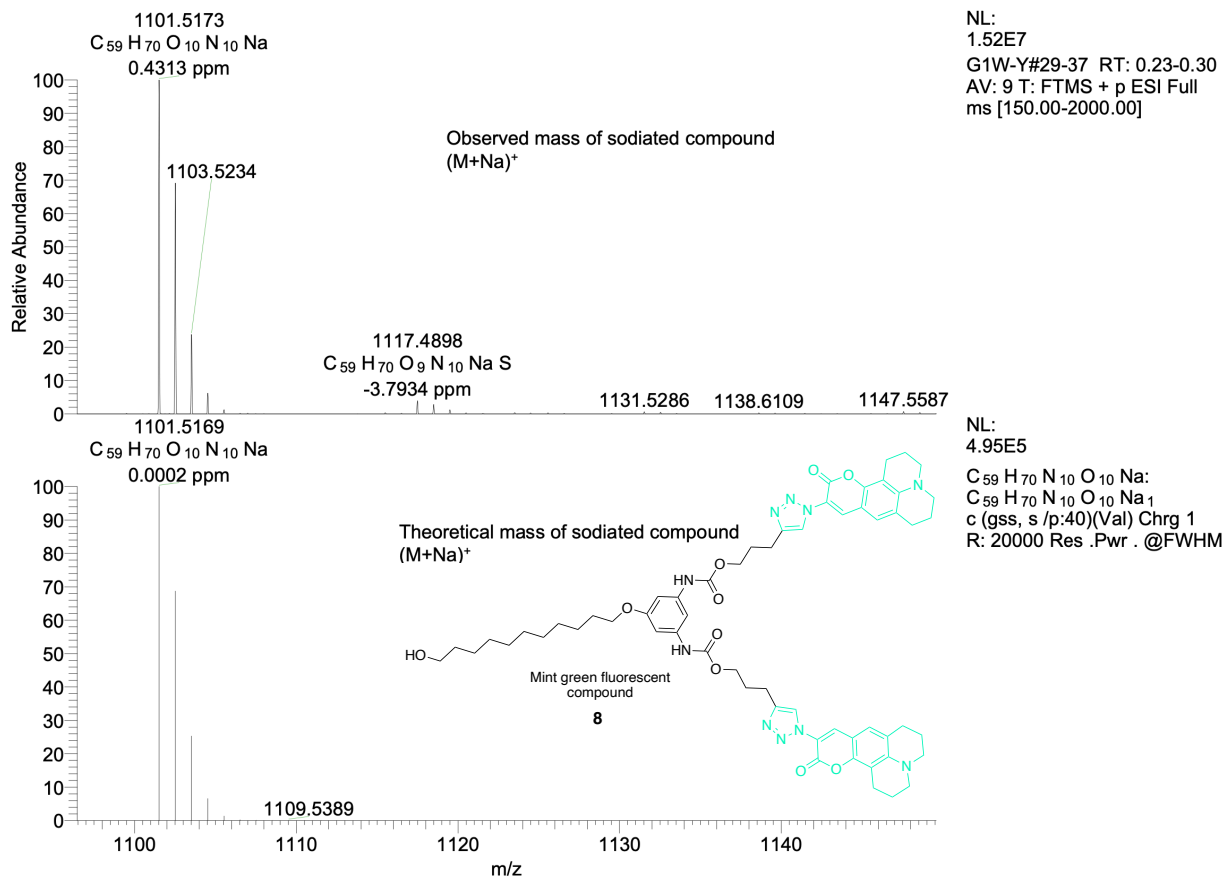

**Figure S39.** HRMS (ESI-LTQ-Orbitrap) spectrum of both-clicked mint green fluorescent compound **8**.

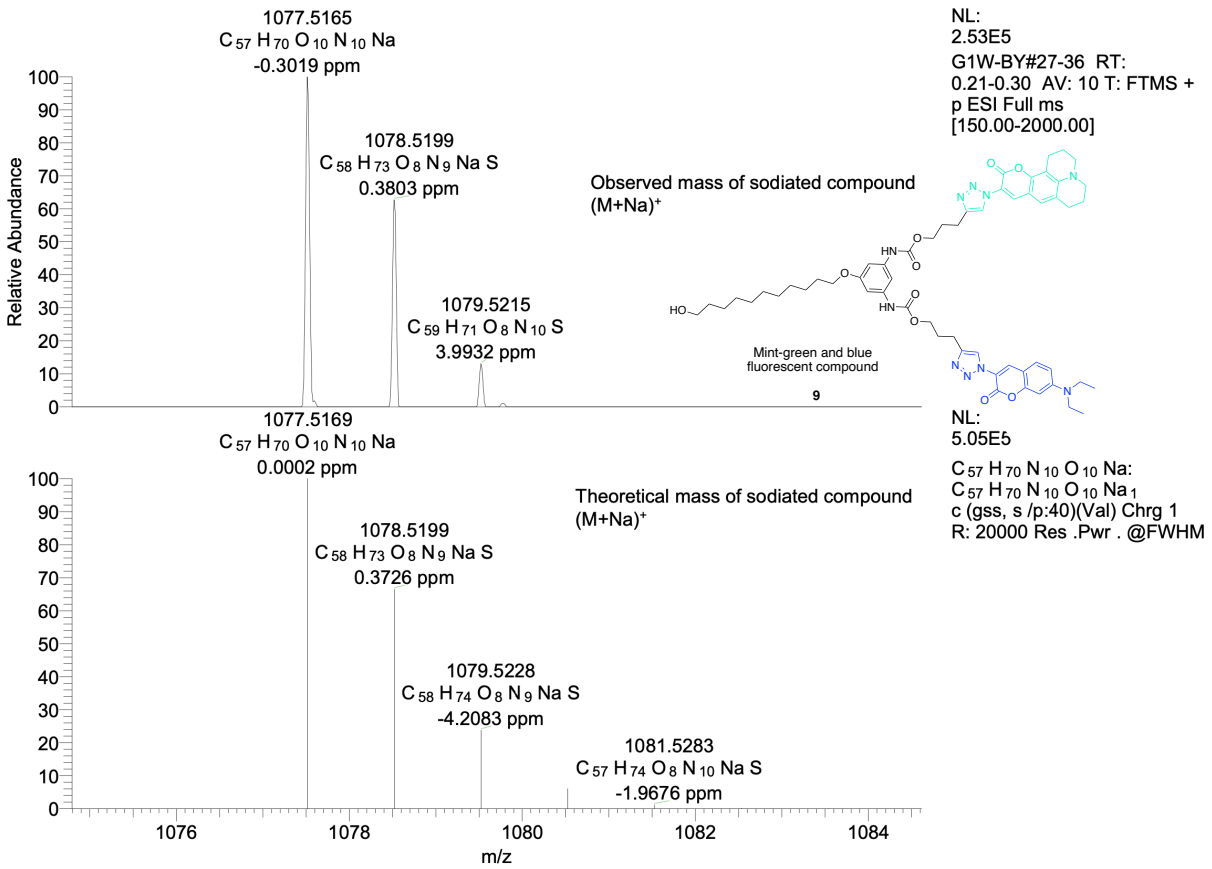

**Figure S40.** HRMS (ESI-LTQ-Orbitrap) spectrum of mint green and blue fluorescing compound **9**.



Comment 1 GID-yne CCA overlay  
Comment 2

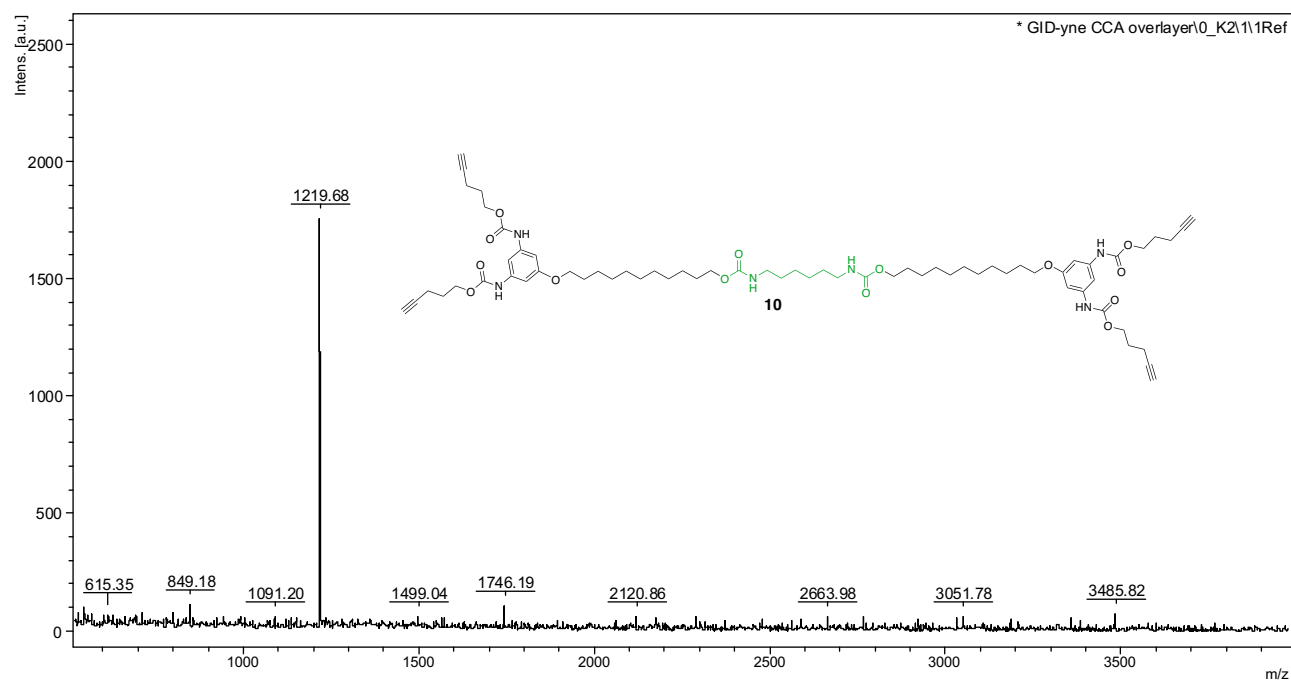

Figure S41. LRMS (MALDI-TOF-MS) of compound 10.

Comment 1 GID-b CCA overlay  
Comment 2

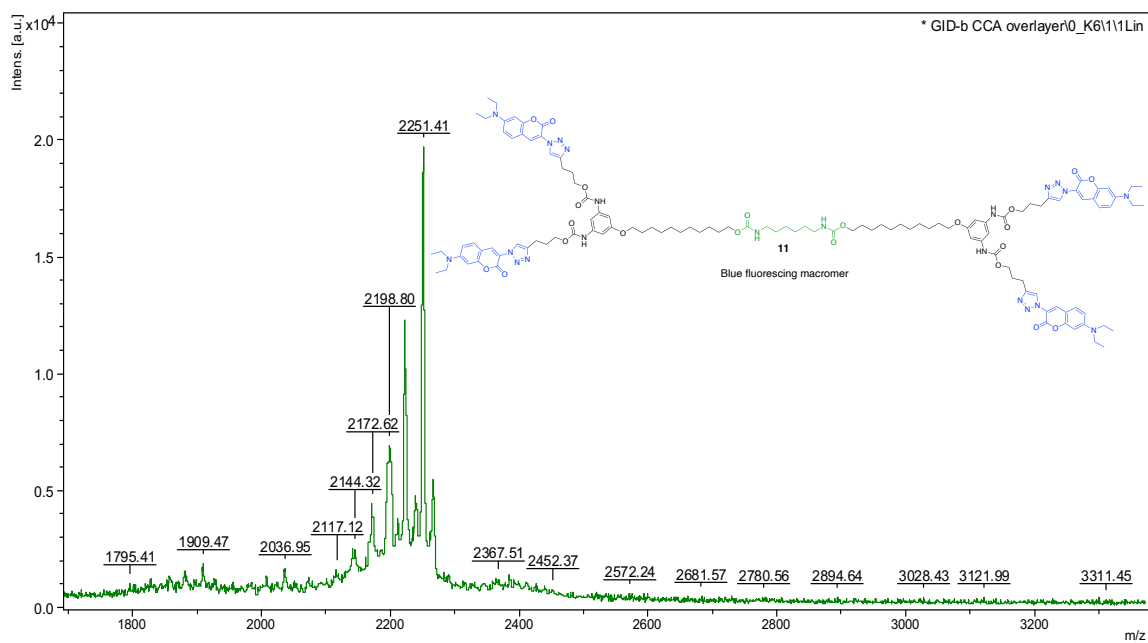

Figure S42. LRMS (MALDI-TOF-MS) of blue fluorescing dendrimer 11.

Comment 1 GID-B3Y1 CCA overlayer  
Comment 2

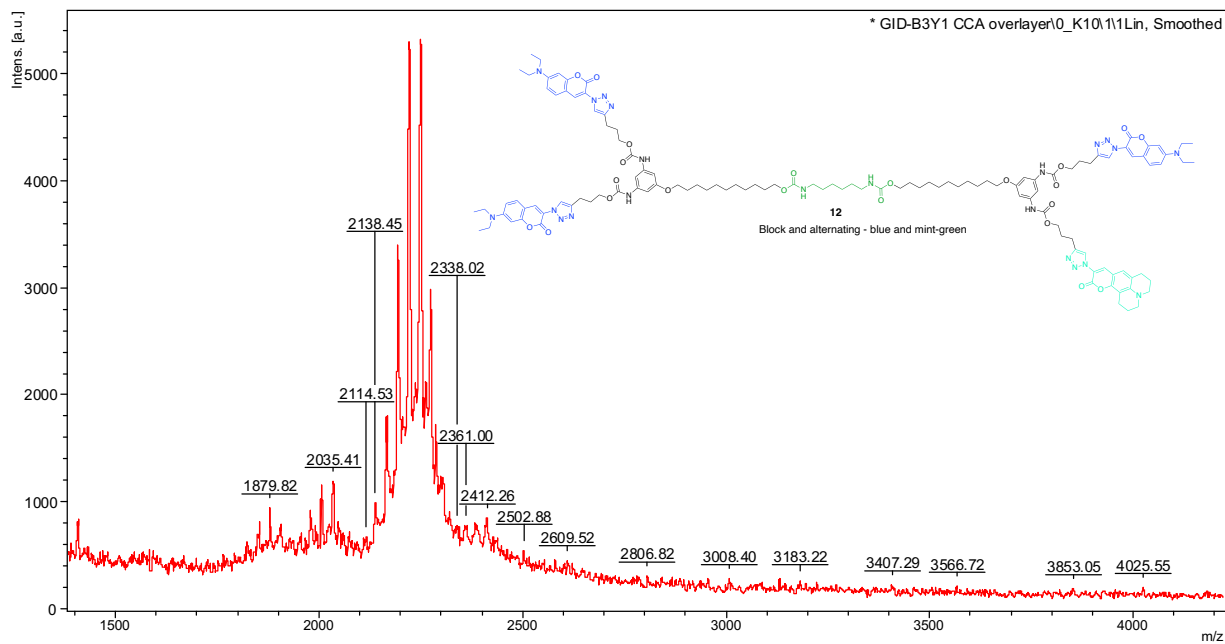

**Figure S43.** LRMS (MALDI-TOF-MS) of blue and mint green fluorescing dendrimer **12**.

Comment 1 GID-by CCA overlayer  
Comment 2

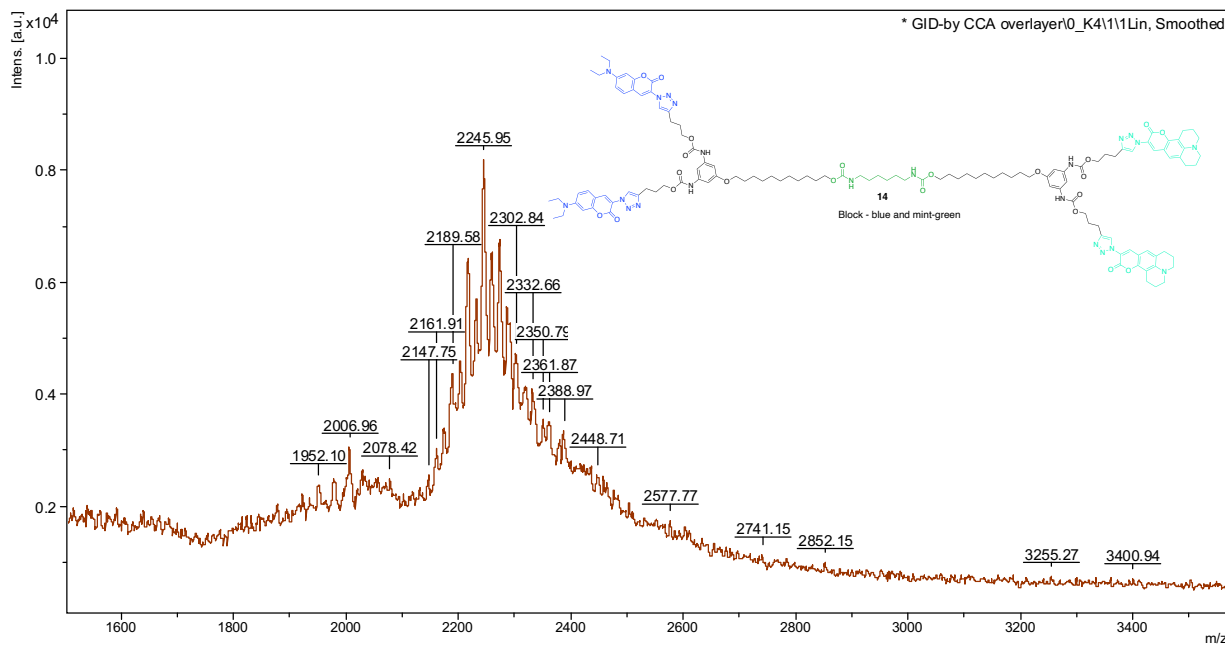

**Figure S44.** LRMS (MALDI-TOF-MS) of block blue and mint green fluorescing dendrimer **14**.

Comment 1    GID-y CCA overlayer  
Comment 2

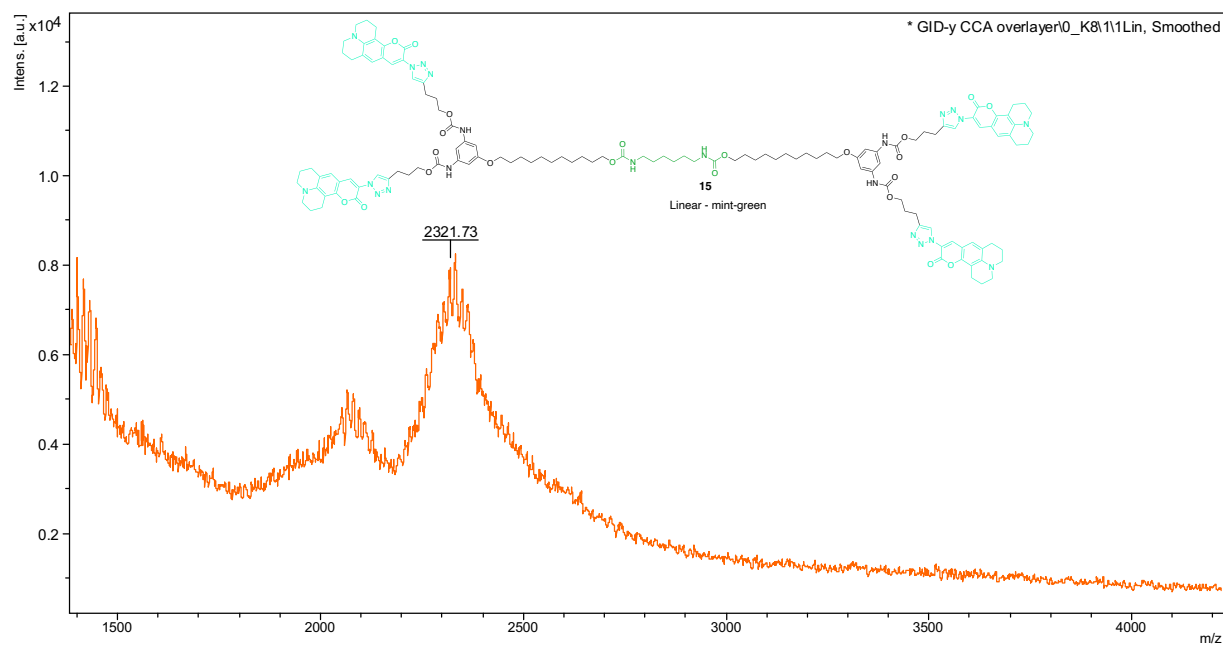

**Figure S45.** LRMS (MALDI-TOF-MS) of mint green fluorescing dendrimer **11**.

#### 4. UV-Vis and fluorescence spectra of PUDs 11 – 15.

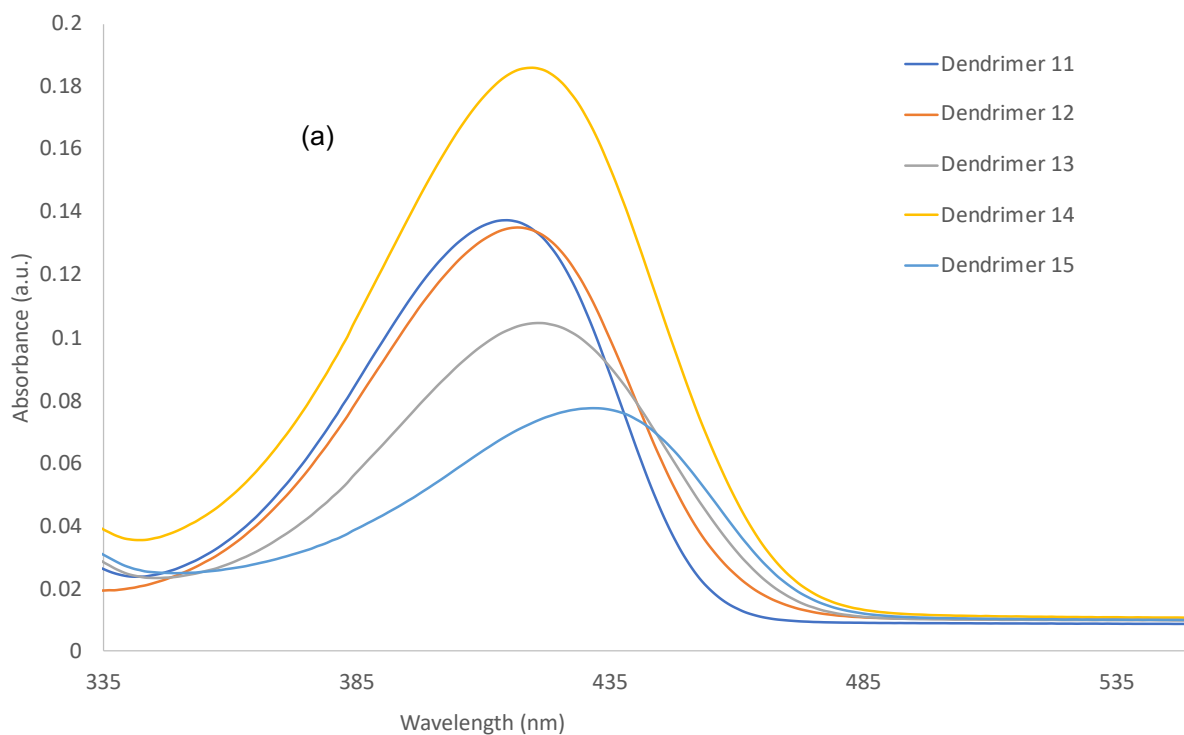

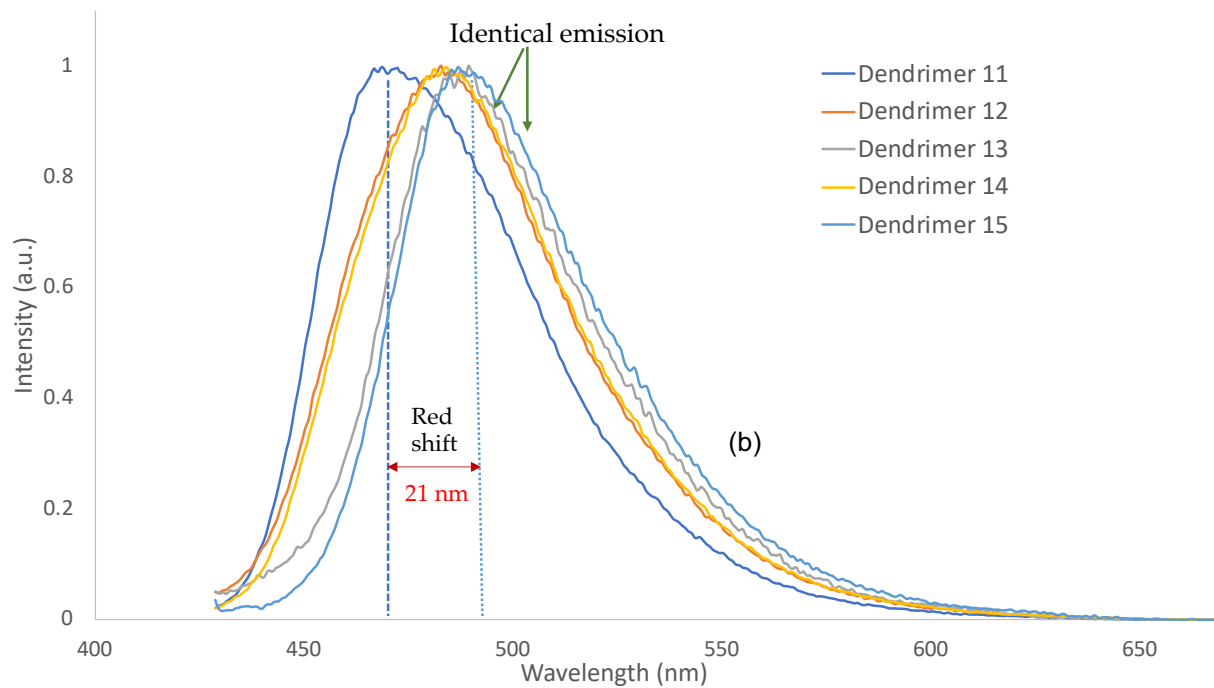

**Figure S46.** a) UV-vis absorption and (b) fluorescence emission spectra of PUDs **11** – **15**.

## 5. References

- a. Poudel DP, Taylor RT. A Model for Late-Stage Modification of Polyurethane Dendrimers Using Thiol–Ene Click Chemistry. *ACS Omega*, 2021, **6**, 12375-12381.
